# Supplementary material for: Encephalartos villosus Lem. Displays a Strong In Vivo and In Vitro Antifungal Potential against Candida glabrata Clinical Isolates
Source: MDPI journal article supplement (doi:10.3390/jof8050521), 2022-05-18

**Table S1.** Sequences of the utilized primers.

| Genes                        | Sequence |                                |
|------------------------------|----------|--------------------------------|
| <i>CDR1</i>                  | F        | 5'-TAGCACATCAACTACACGAACGT-3'  |
|                              | R        | 5'-AGAGTGAACATTAAGGATGCCATG-3' |
| <i>CDR2</i>                  | F        | 5'-GTGCTTTATGAAGGCTACCAGATT-3' |
|                              | R        | 5'-TCTTAGGACAGAAGTAACCCATCT-3' |
| <i>ERG11</i>                 | F        | 5'-ATTGGTGTCTTGATGGGTGGTC-3'   |
|                              | R        | 5'-TCTTCTTGGACATCTGGTCTTTCA-3' |
| <i>URA3</i> (reference gene) | F        | 5'-GAAAACCAATCTTTGTGCTTCTCT-3' |
|                              | R        | 5'-CATGAGTCTTAAGCAAGCAAATGT-3' |

**Table S2.** MIC Values of EVME against the tested *C. glabrata* isolates.

| Isolate code | MIC value<br>(µg/mL) | Isolate code | MIC value<br>(µg/mL) |
|--------------|----------------------|--------------|----------------------|
| C1           | 32                   | C7           | 128                  |
| C2           | 32                   | C8           | 256                  |
| C3           | 256                  | C9           | 128                  |
| C4           | 64                   | C10          | 32                   |
| C5           | 128                  | C11          | 128                  |
| C6           | 32                   | C12          | 64                   |

**Figure S1.** MS<sup>2</sup> spectral fragmentation of all identified metabolites.

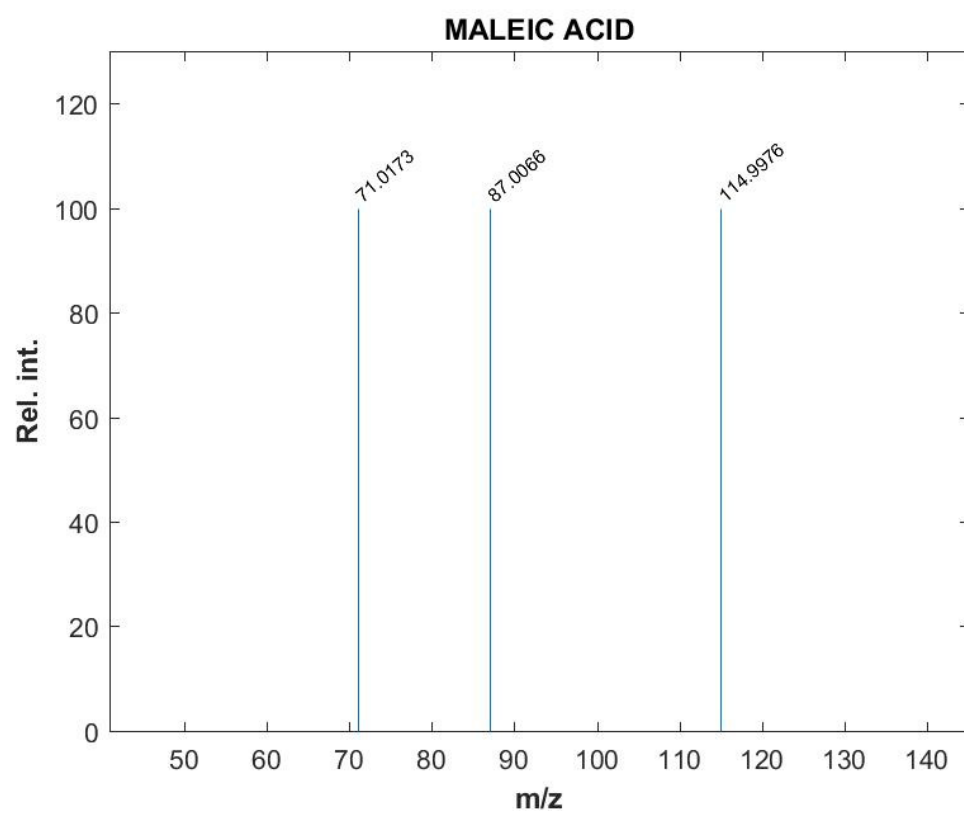

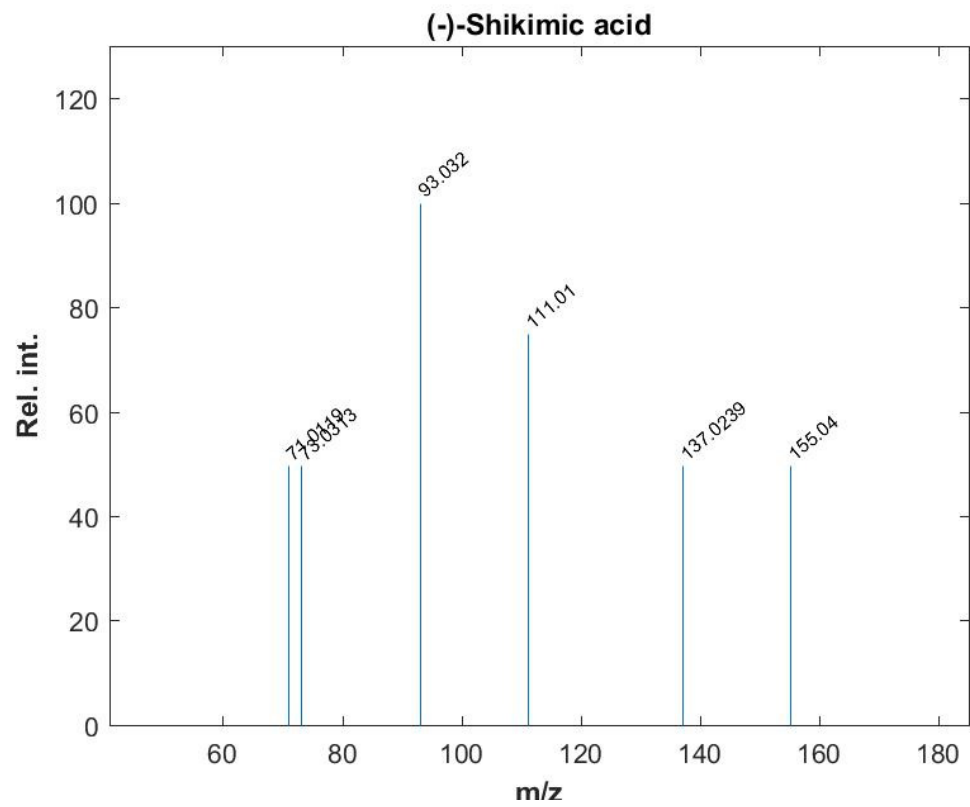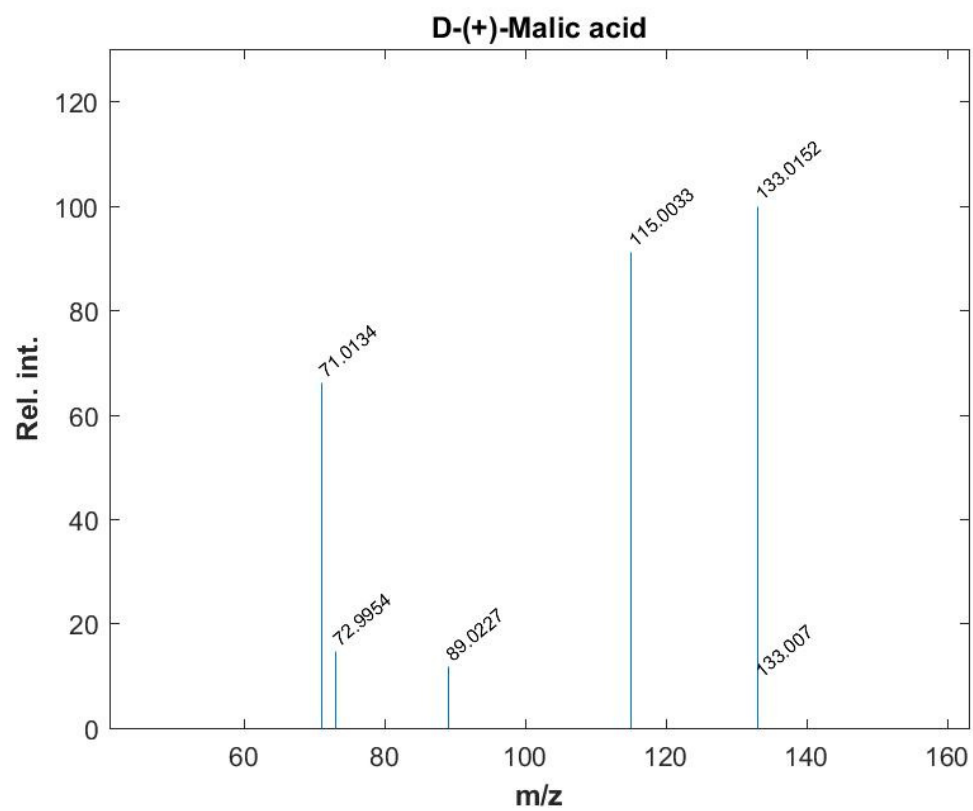

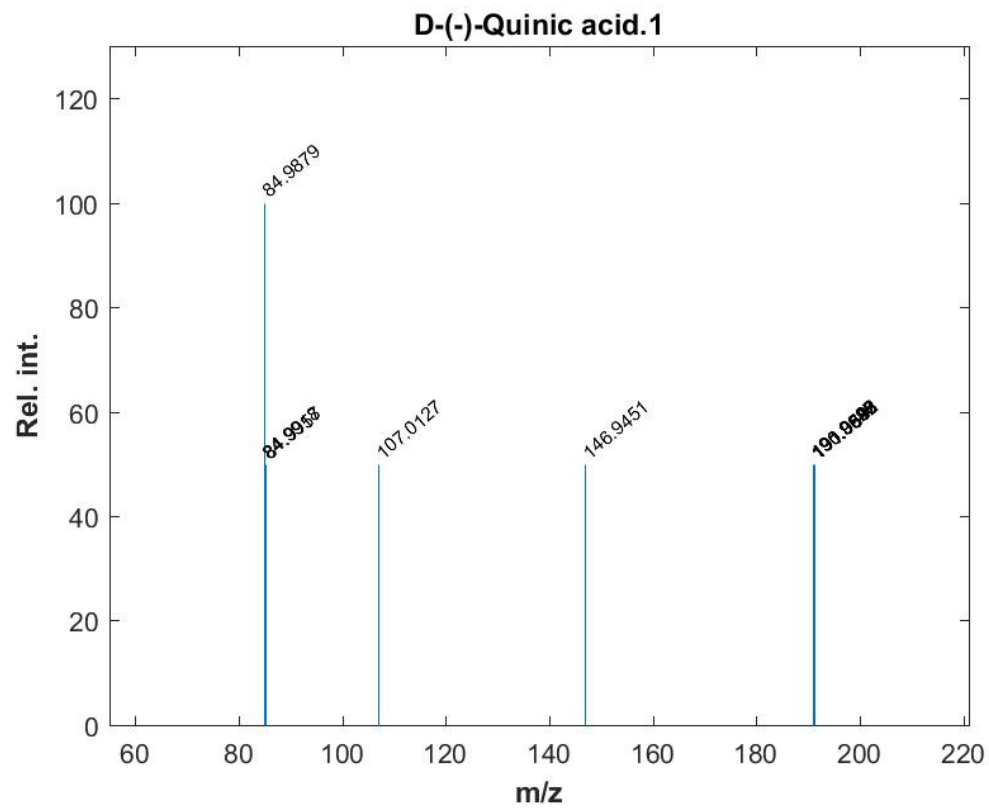

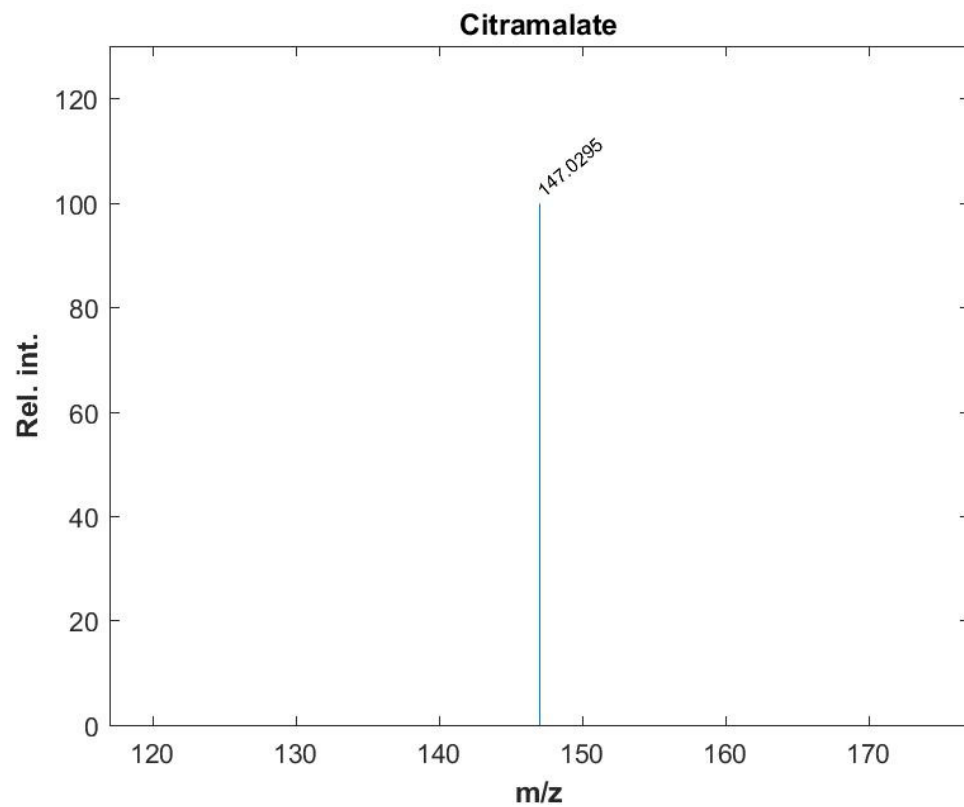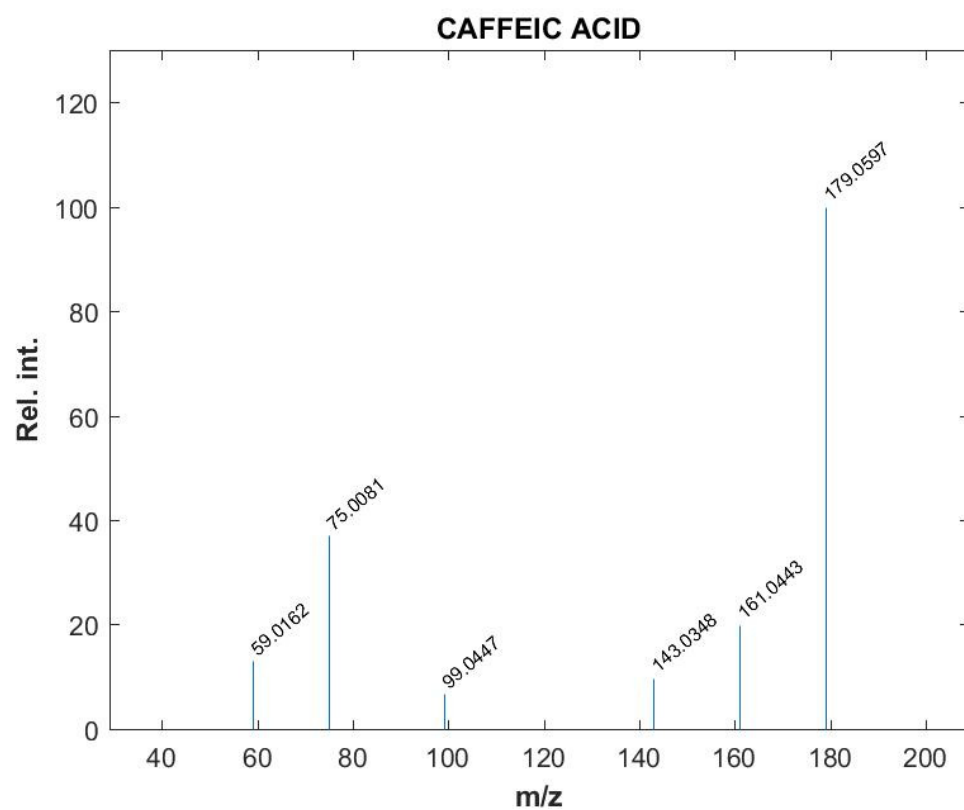

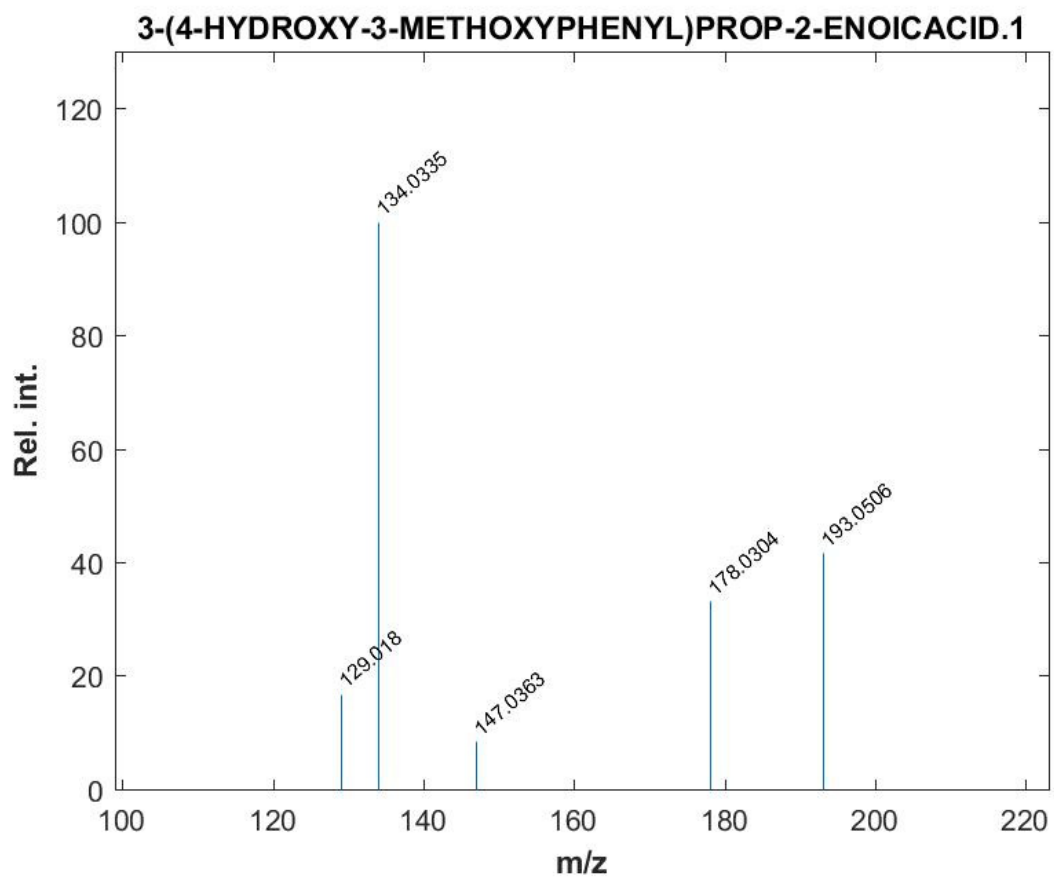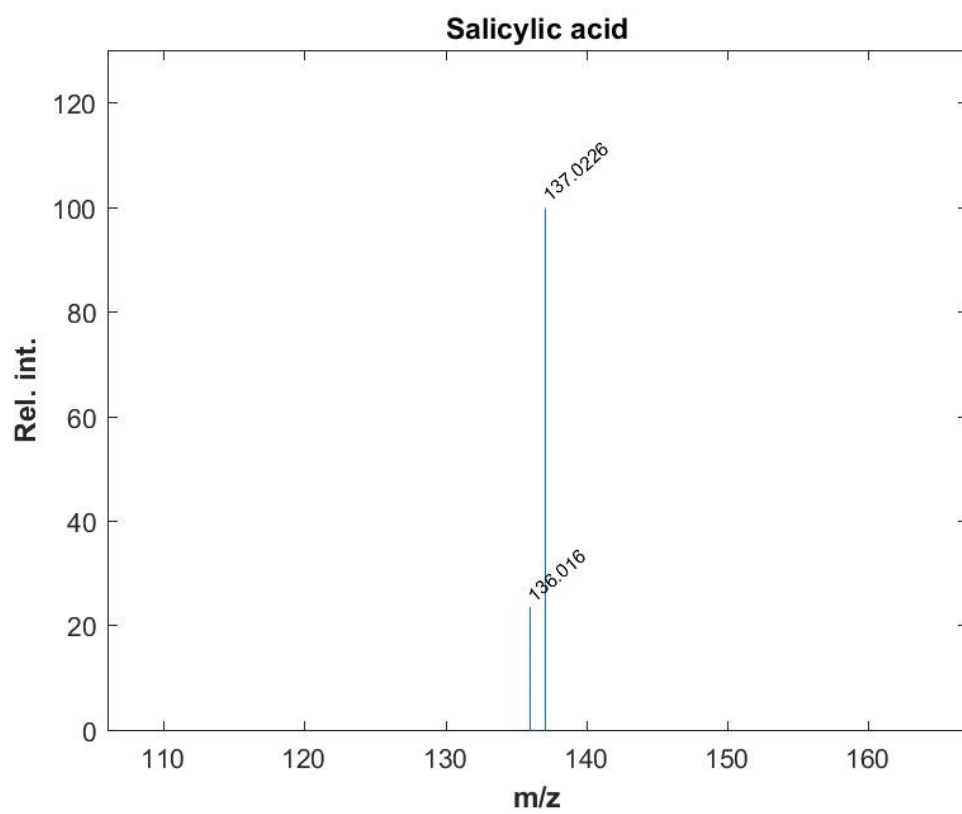

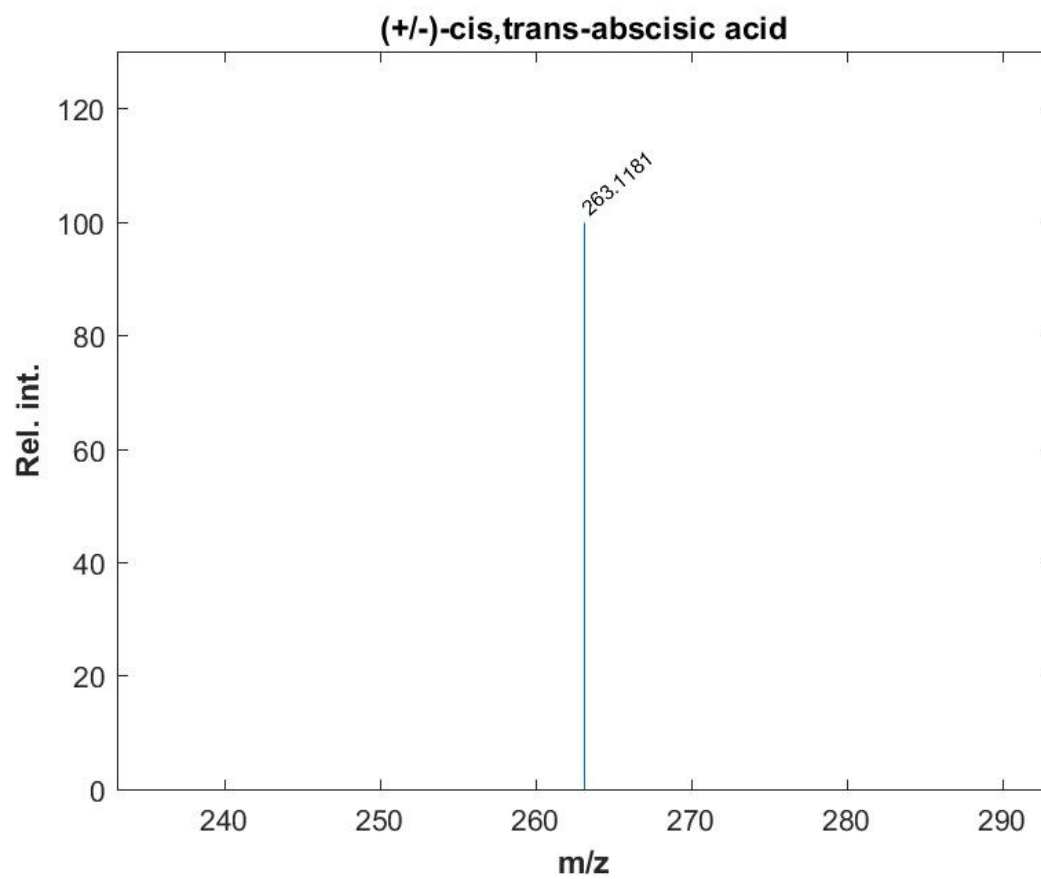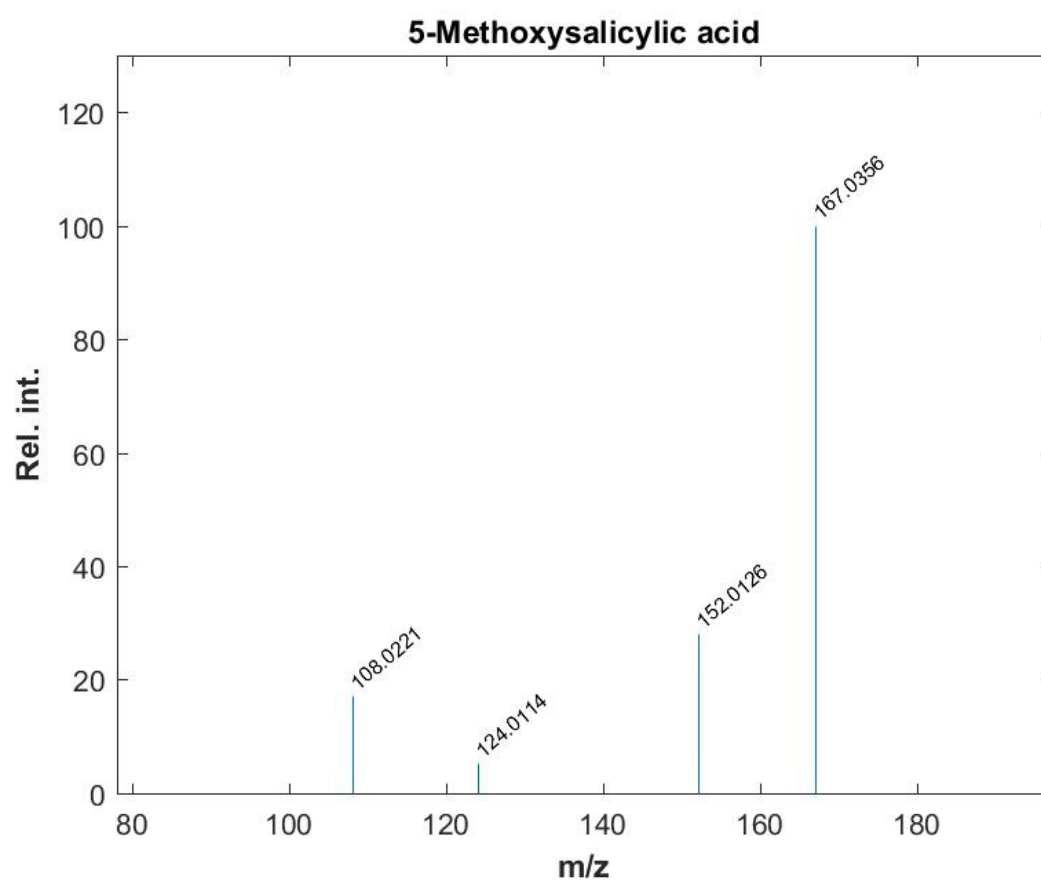

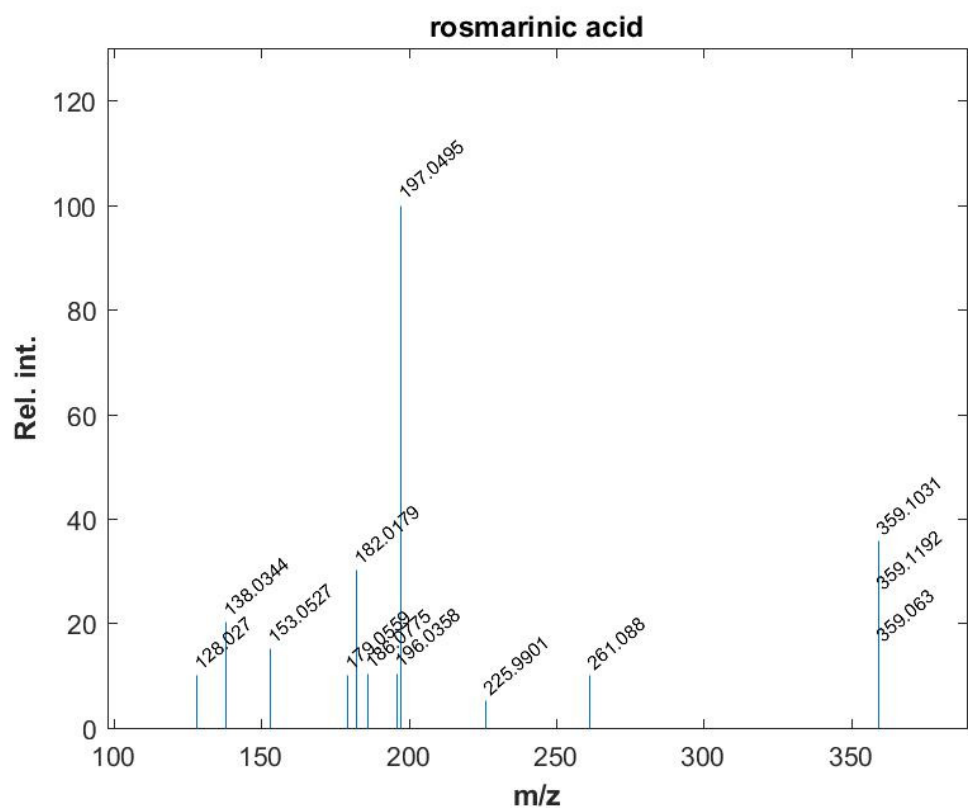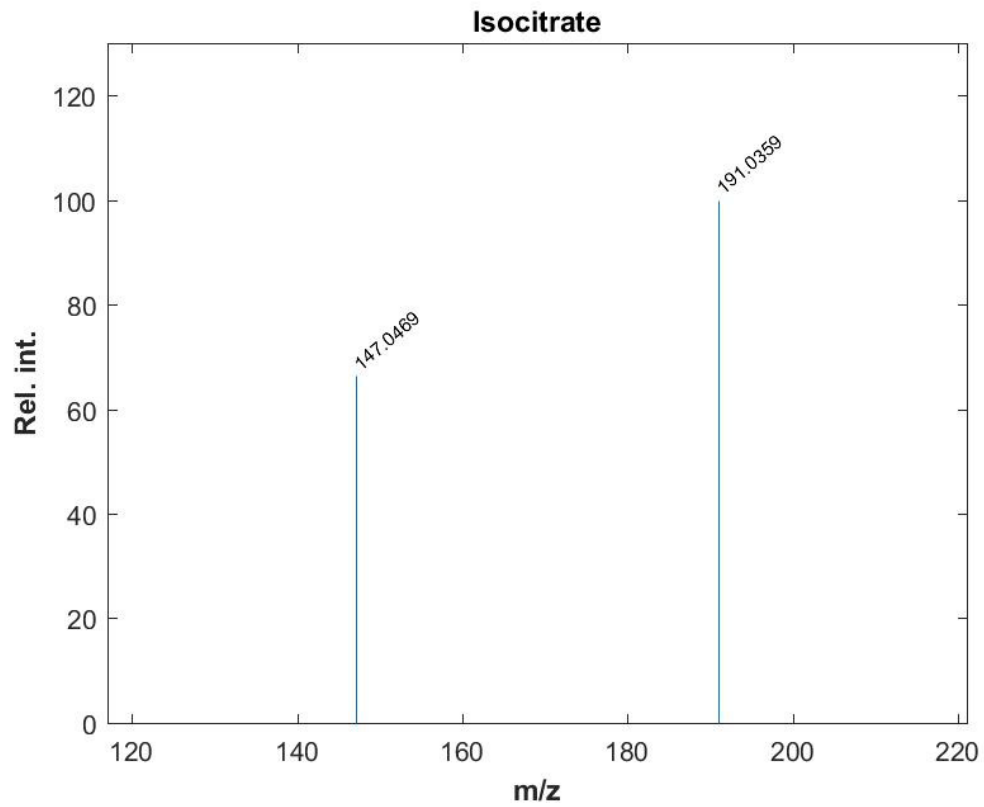



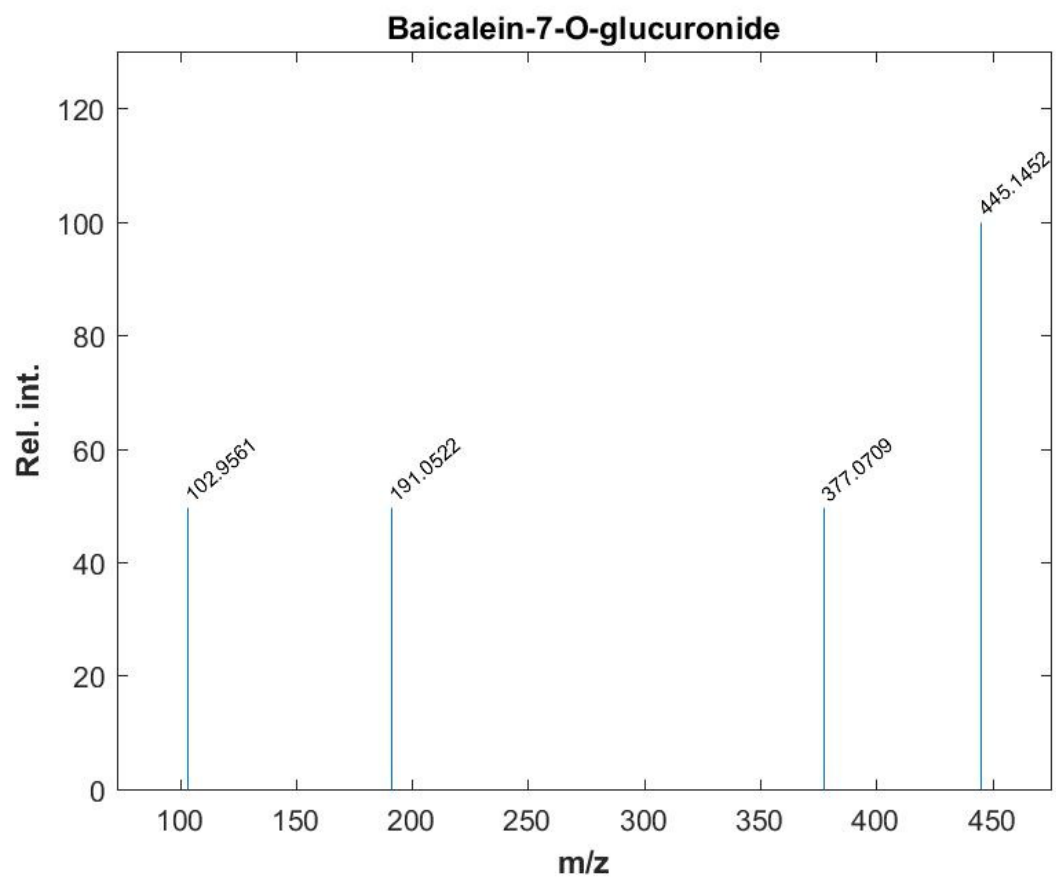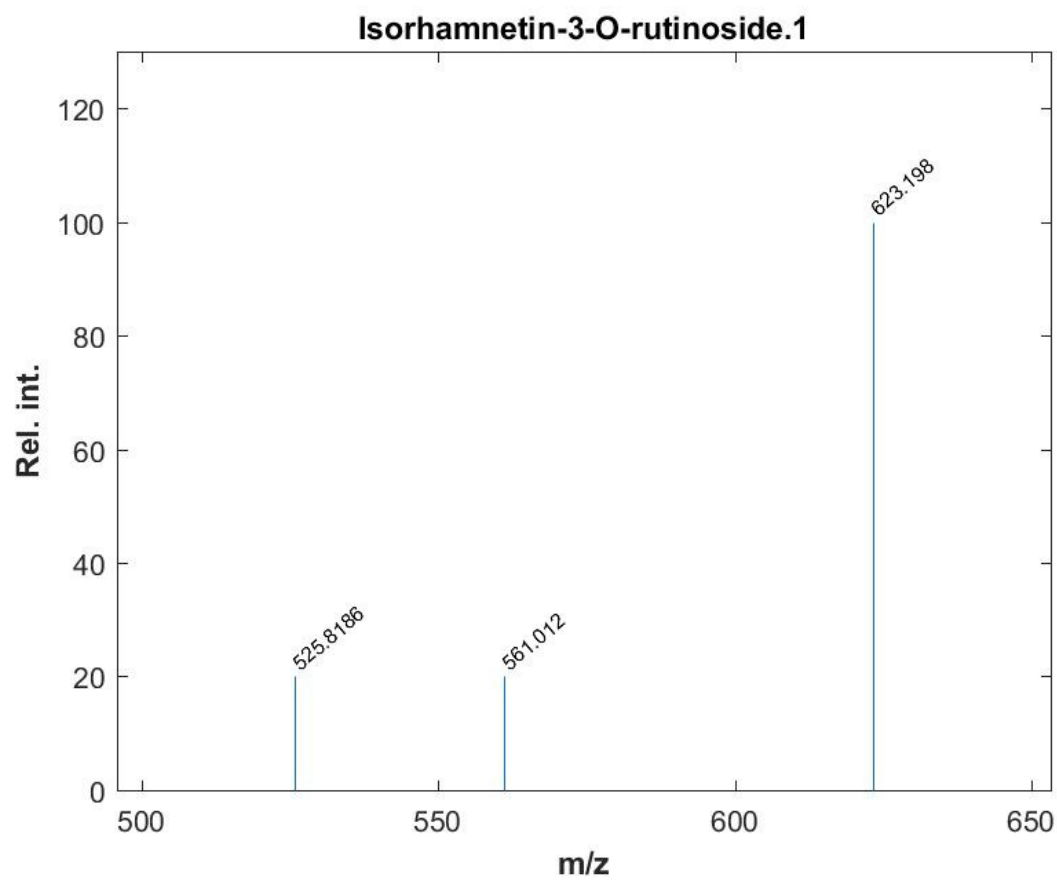

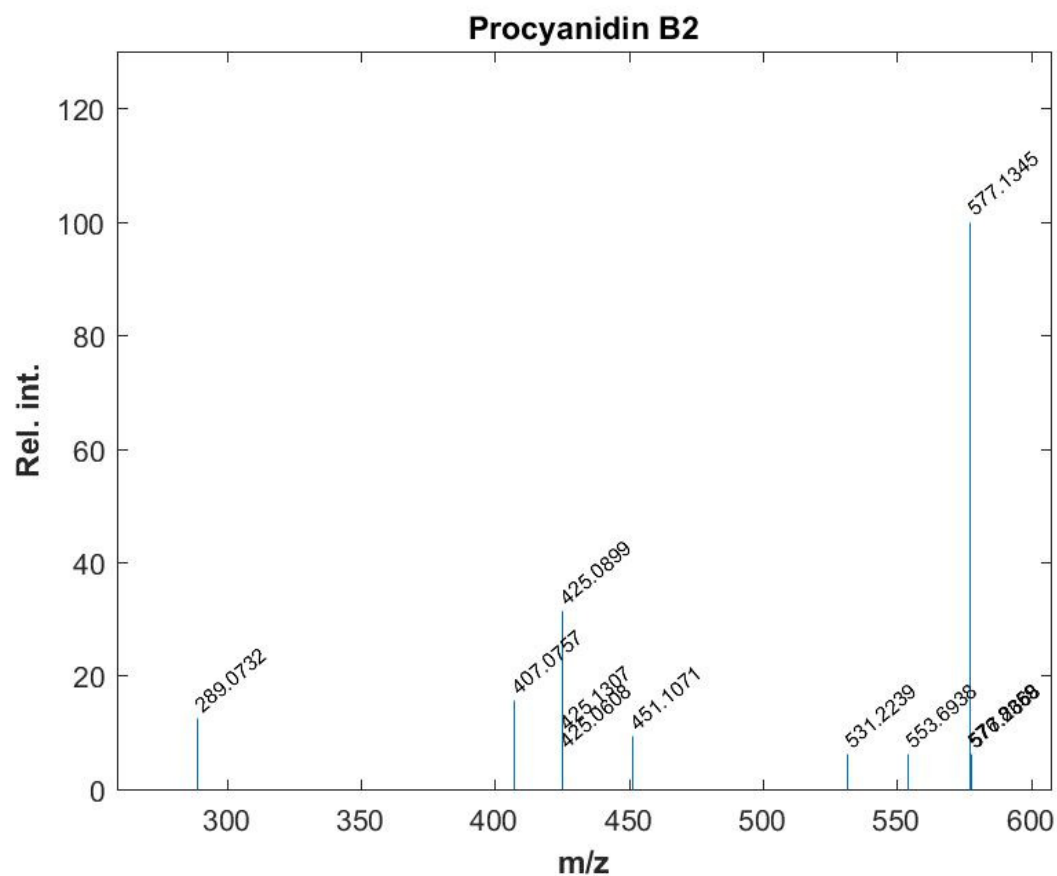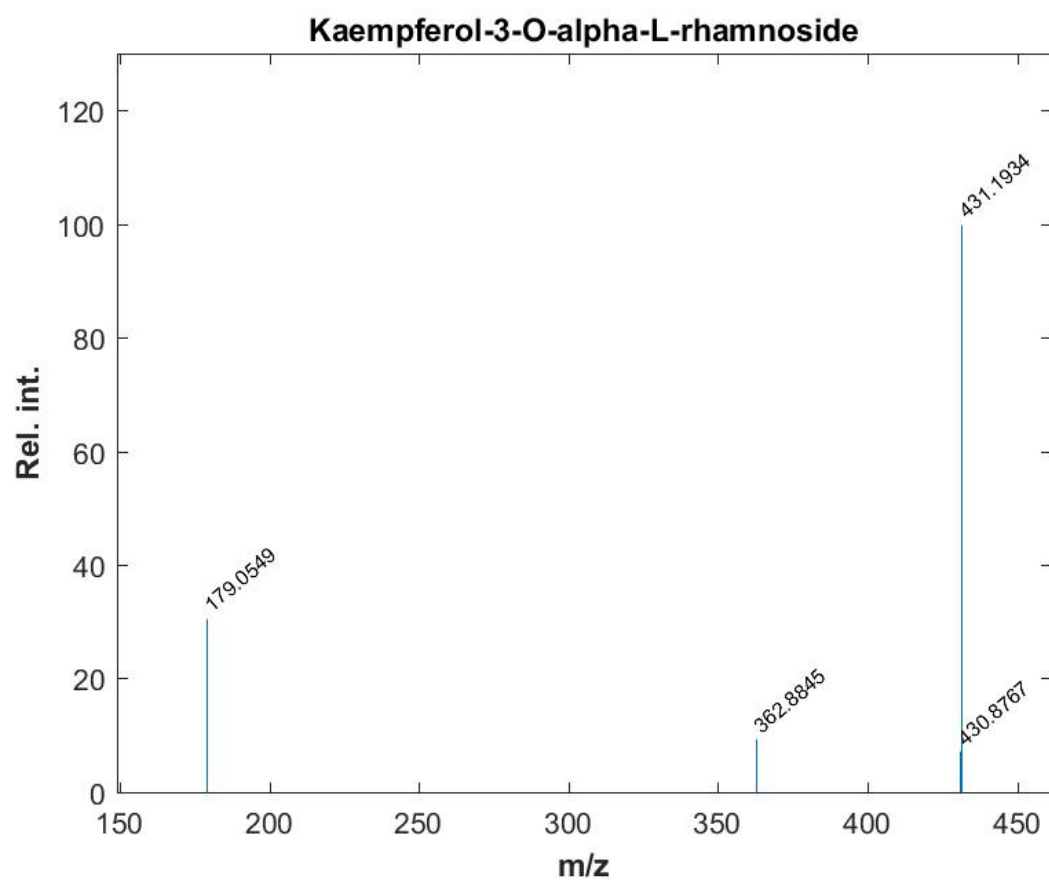

# Naringenin-7-O-glucoside

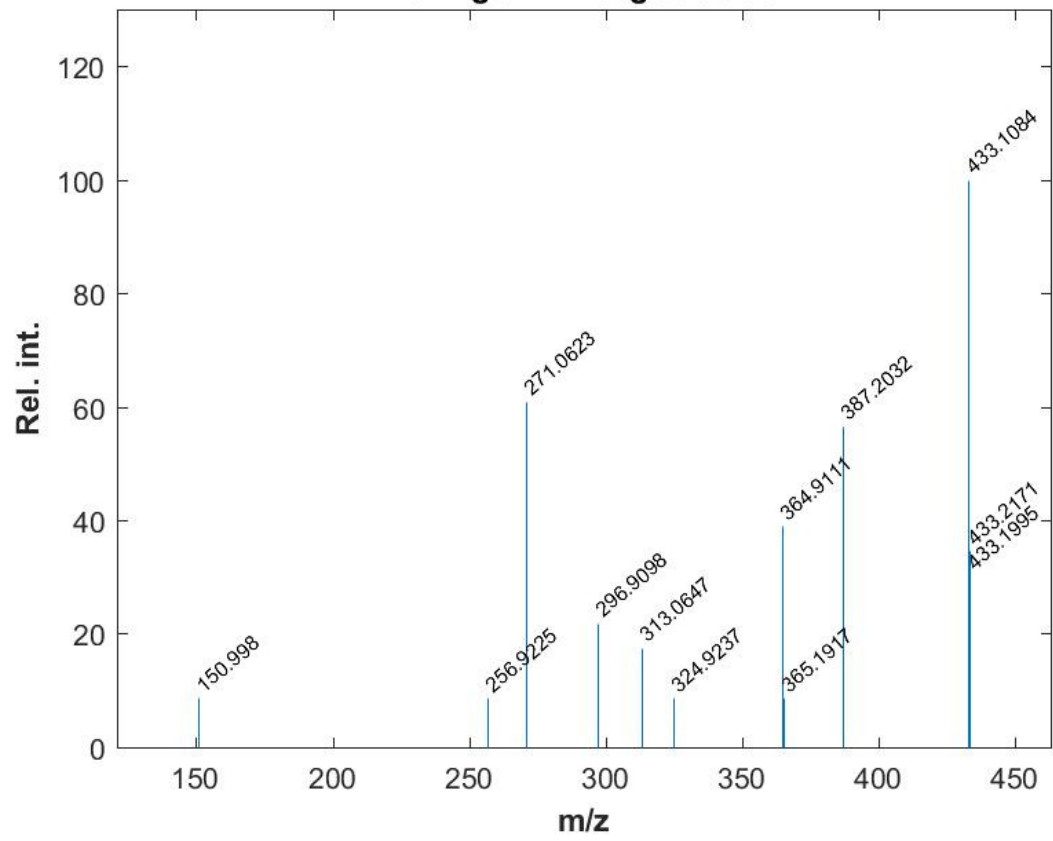

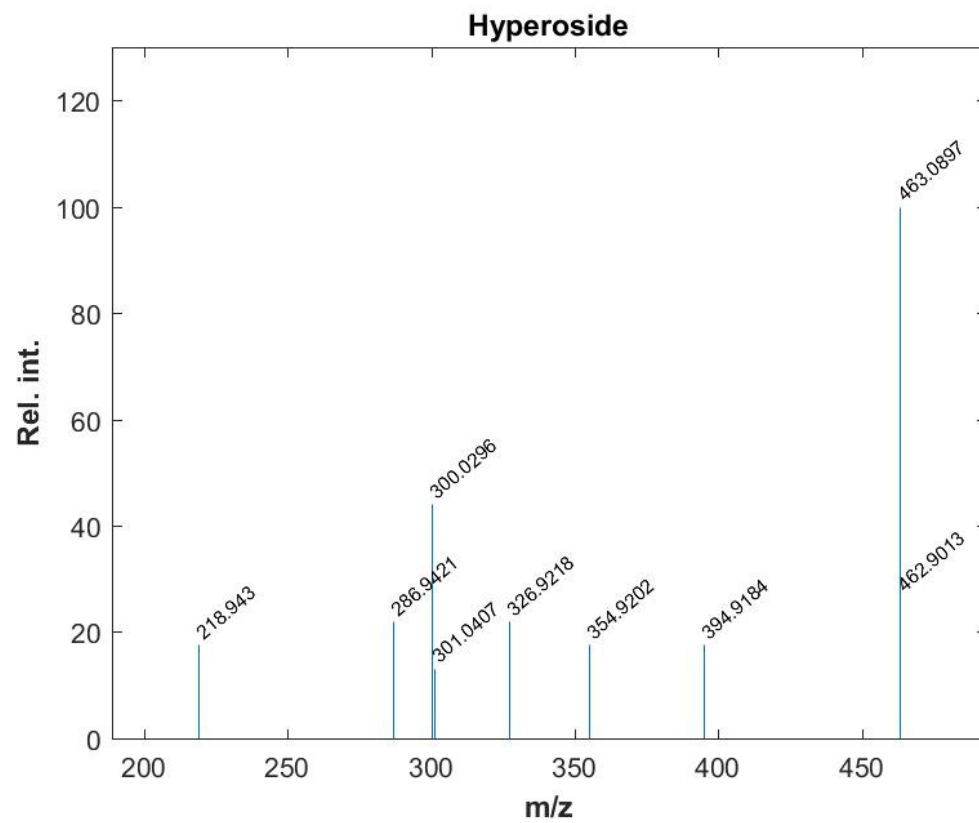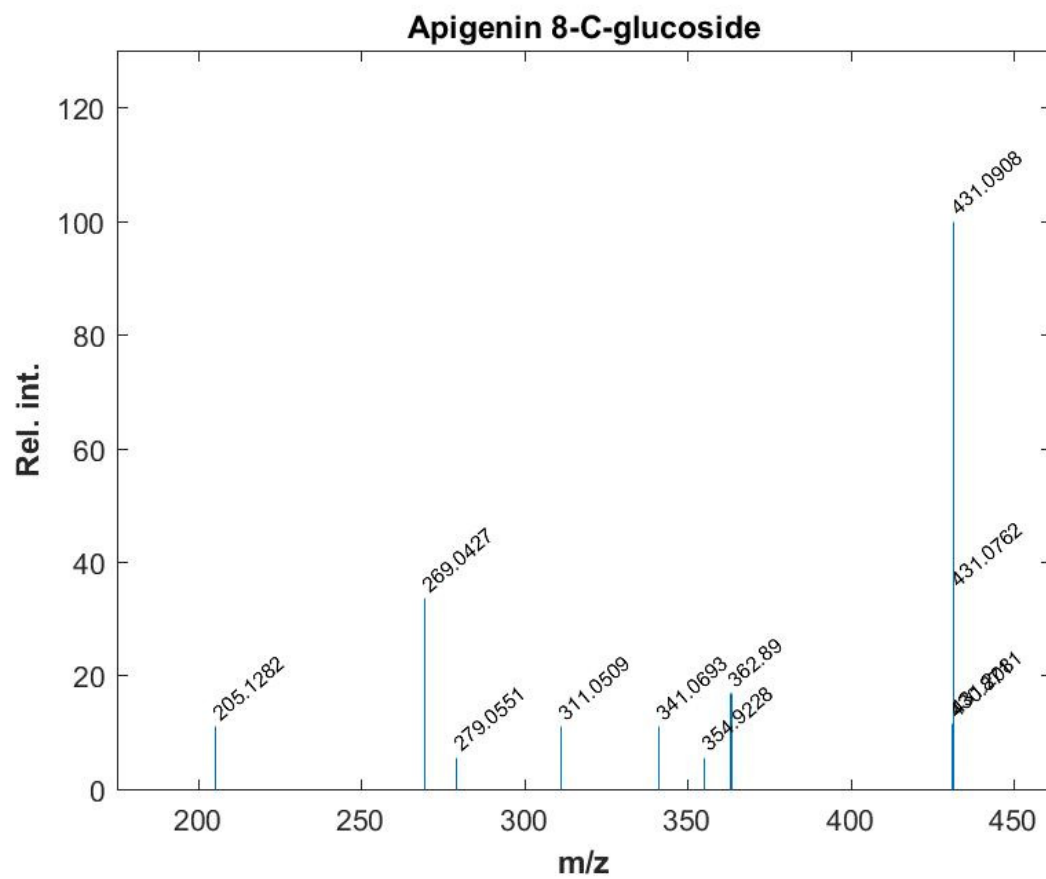

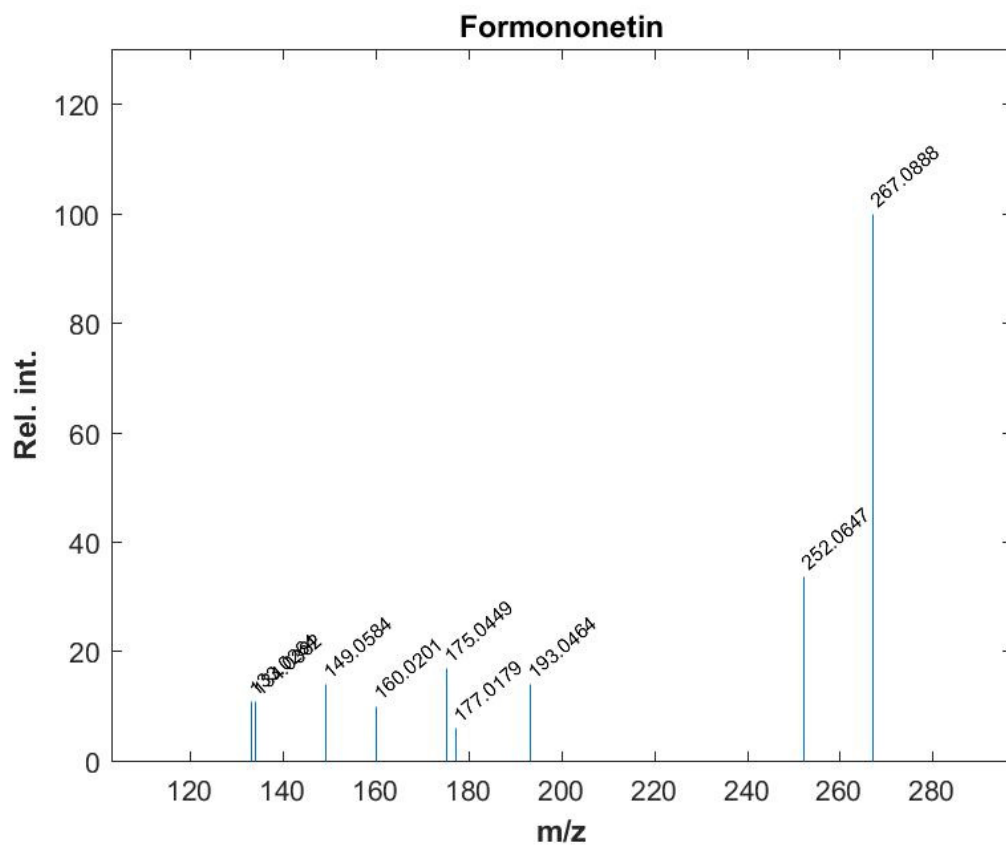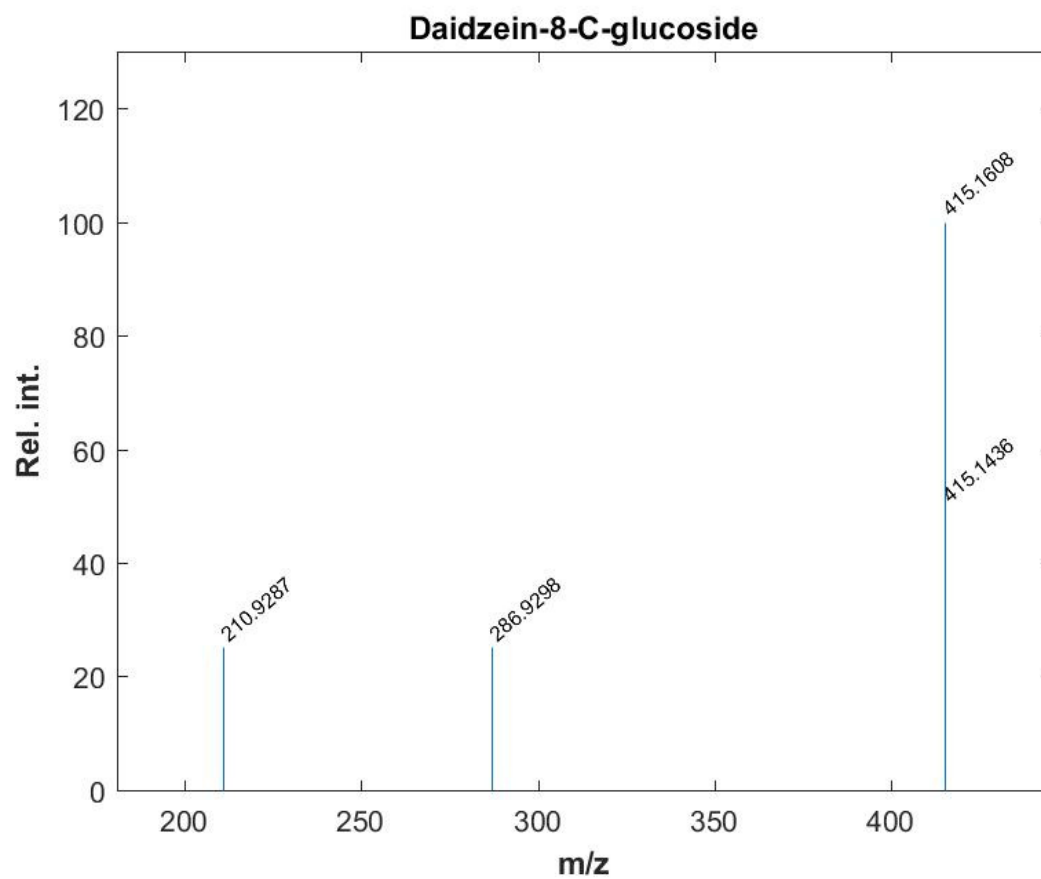

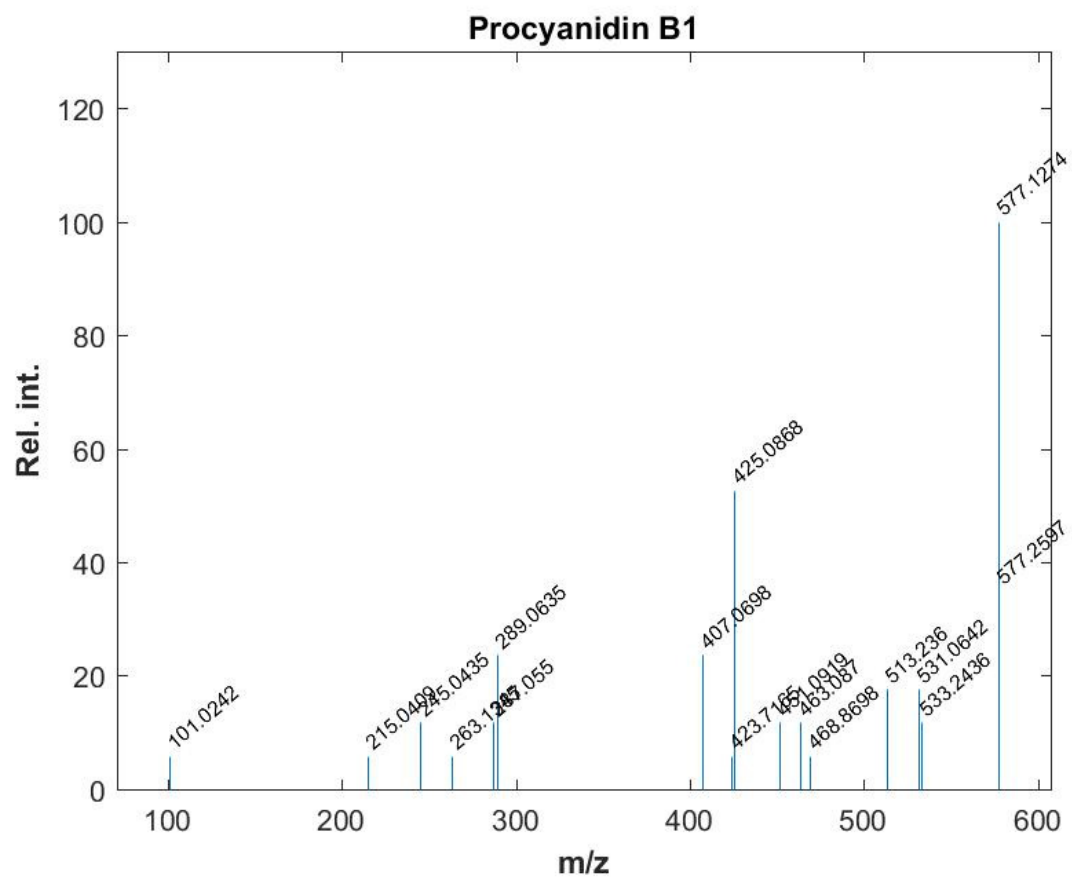

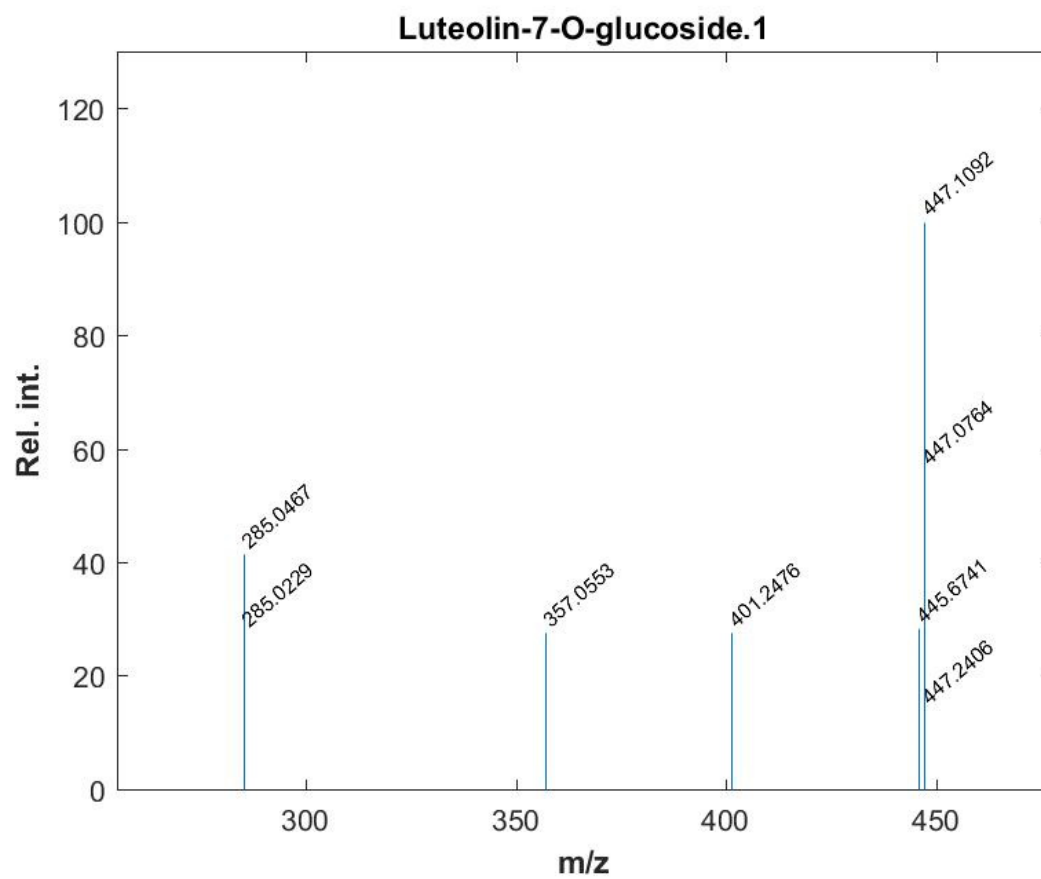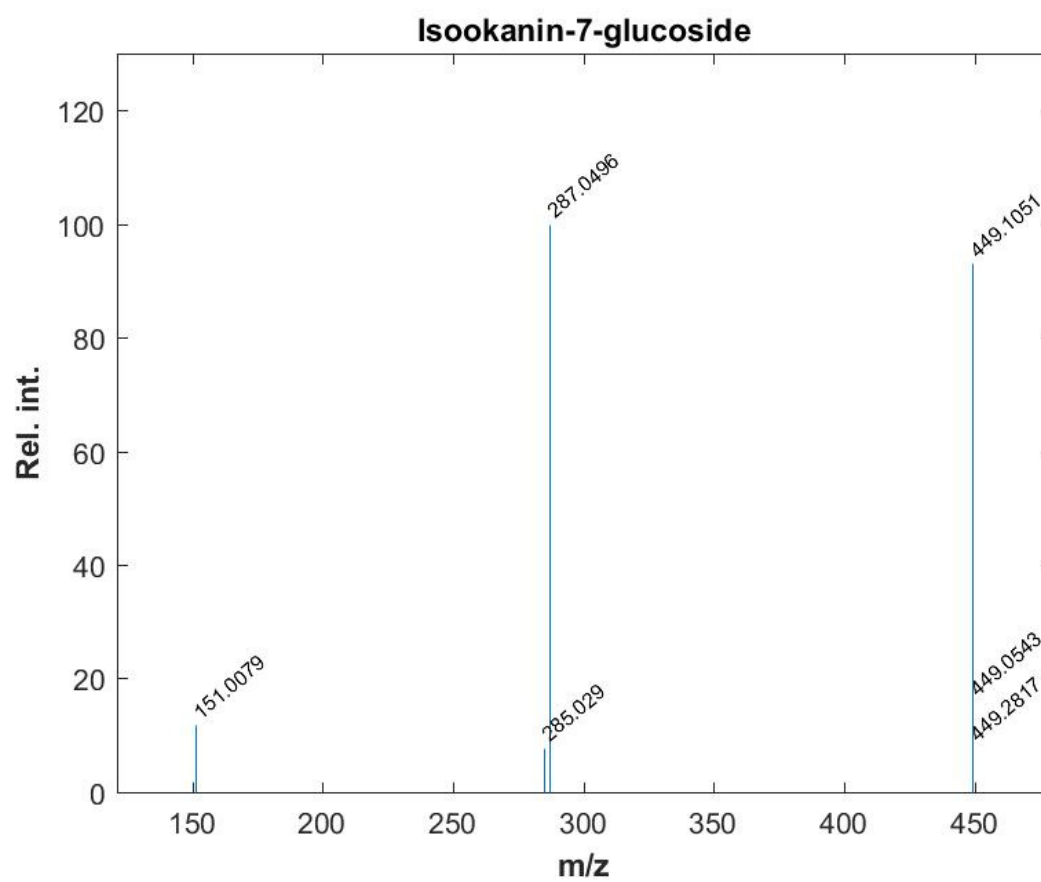

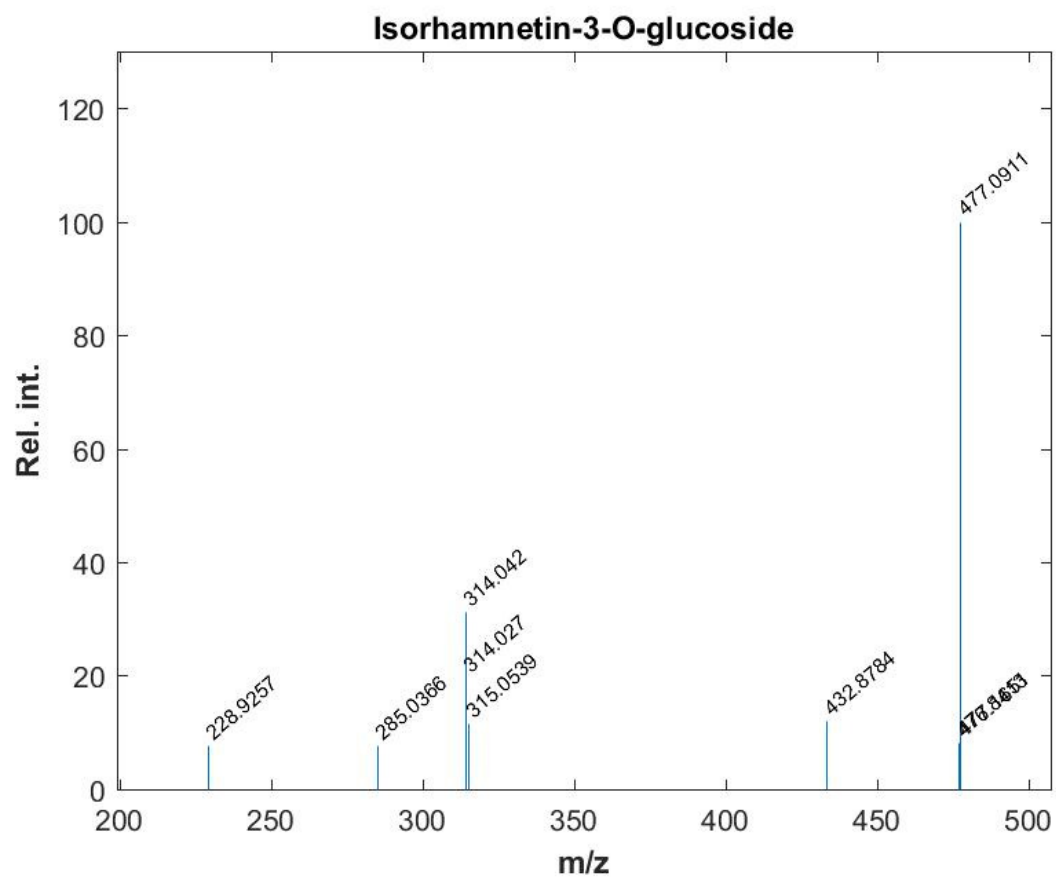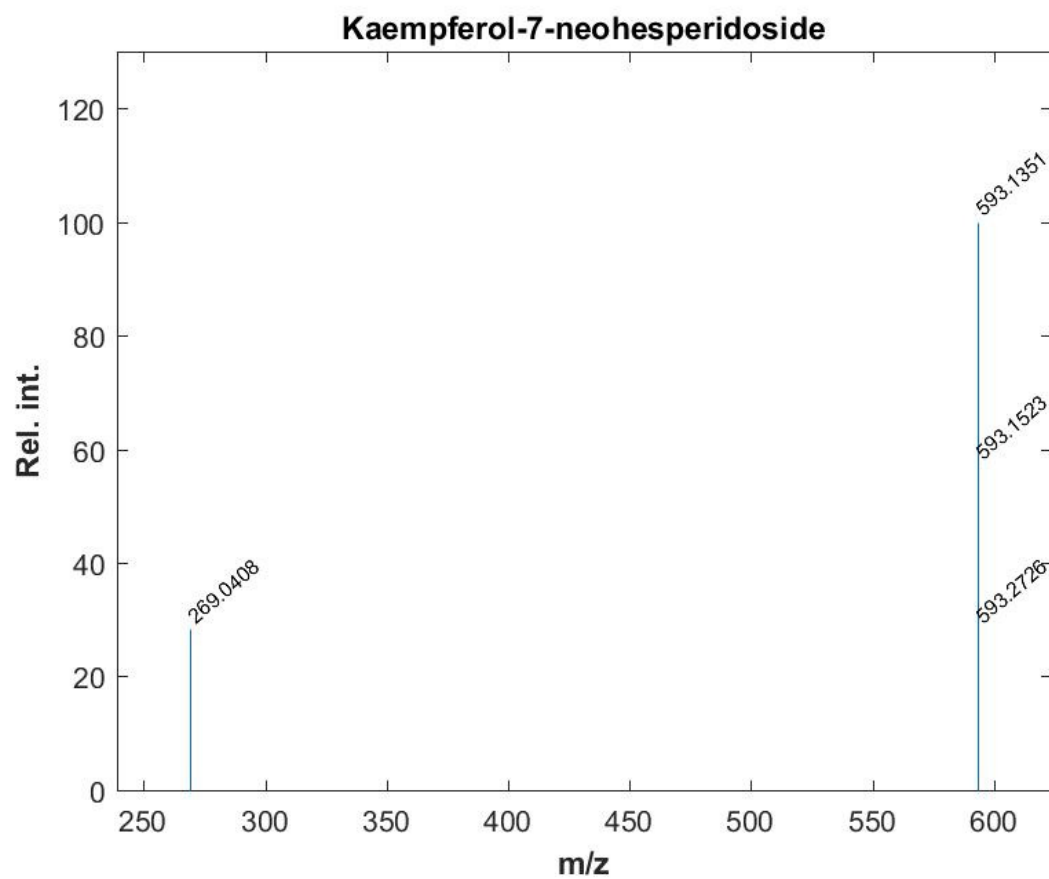



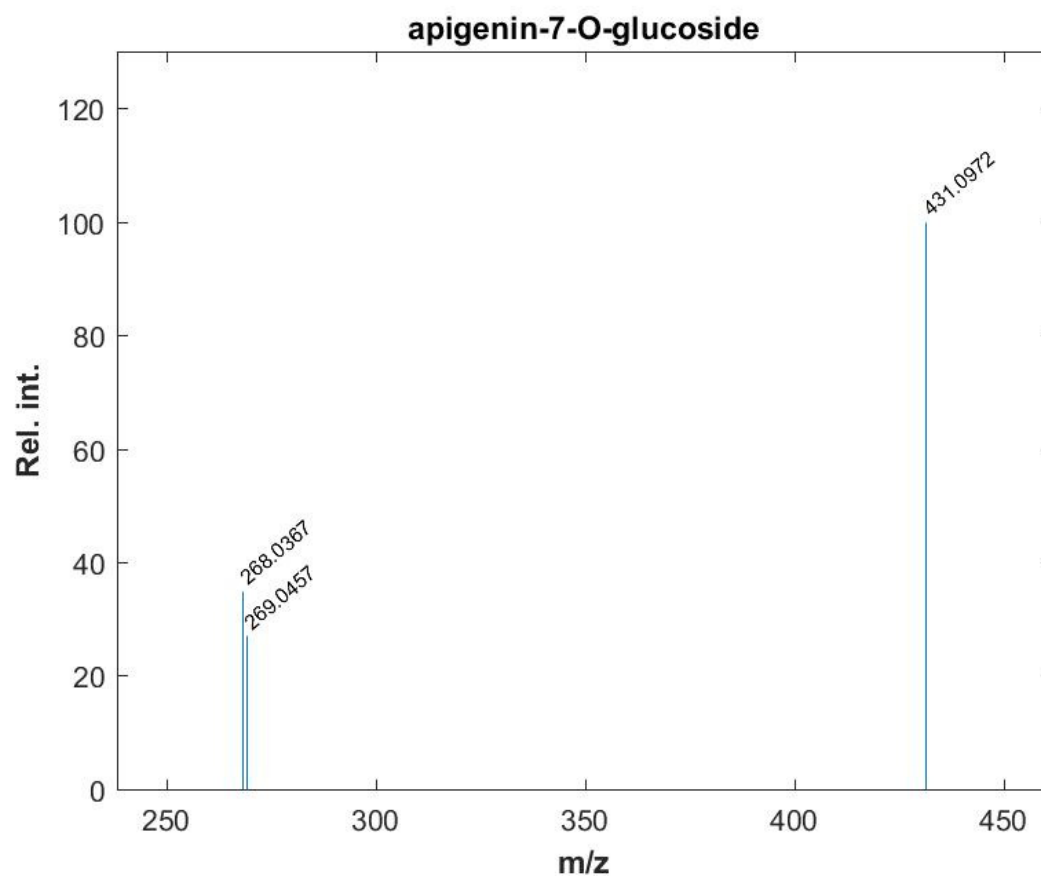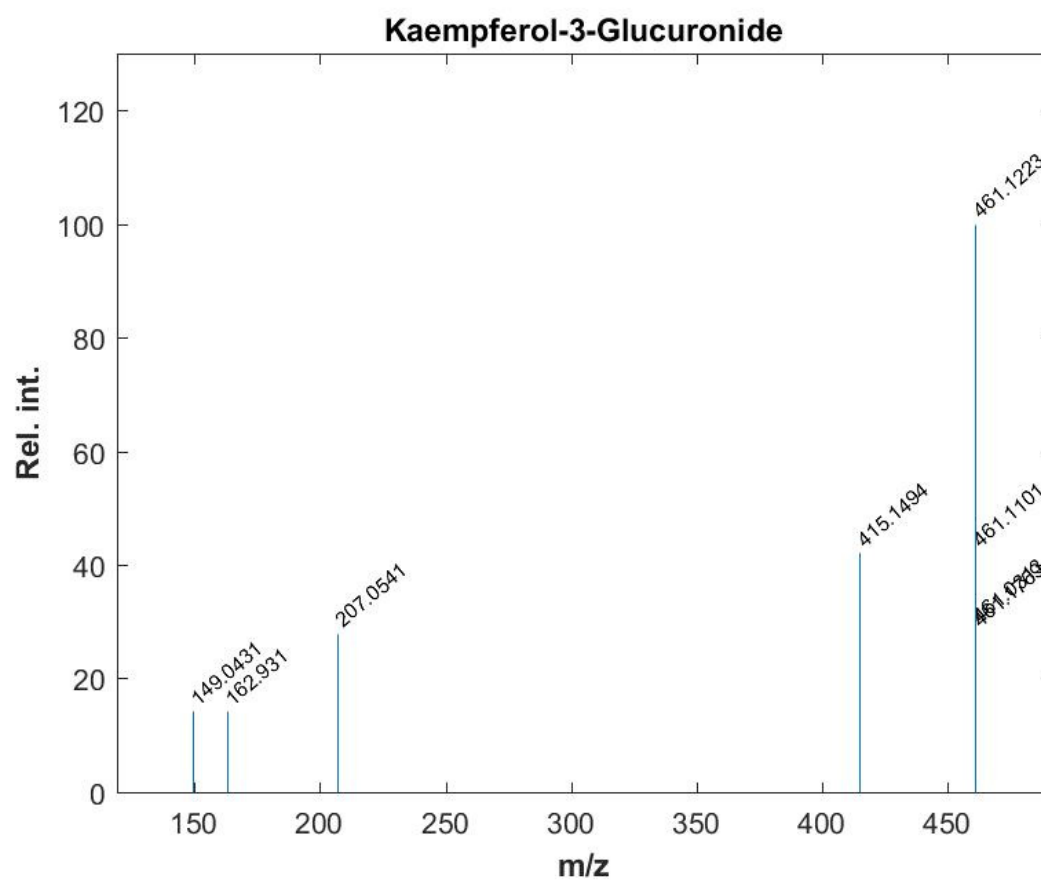

3' 4' 5 7-tetrahydroxyflavanone.2

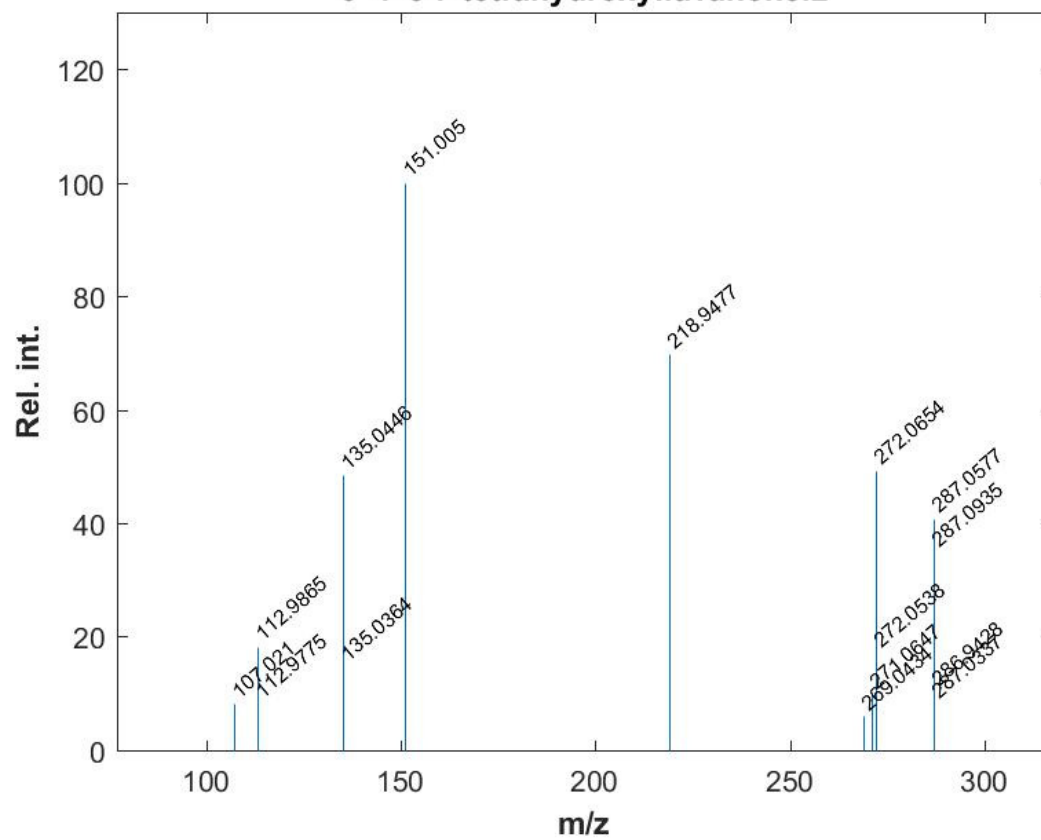

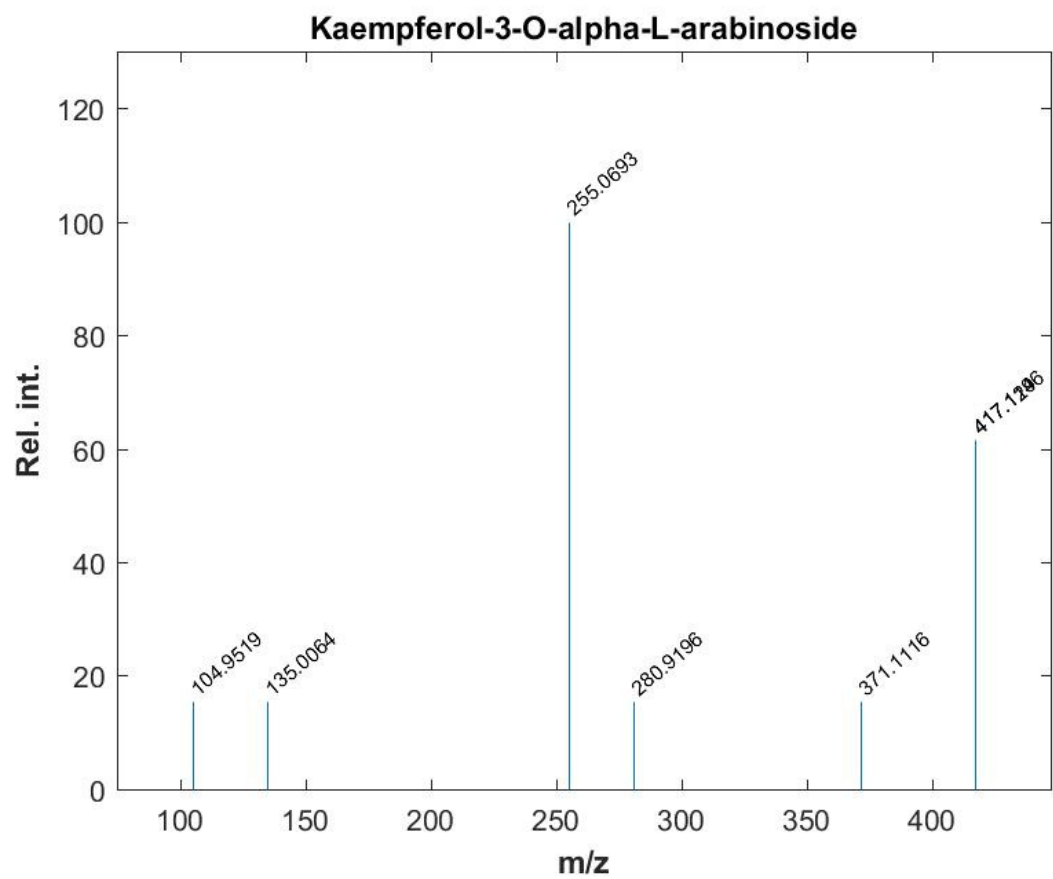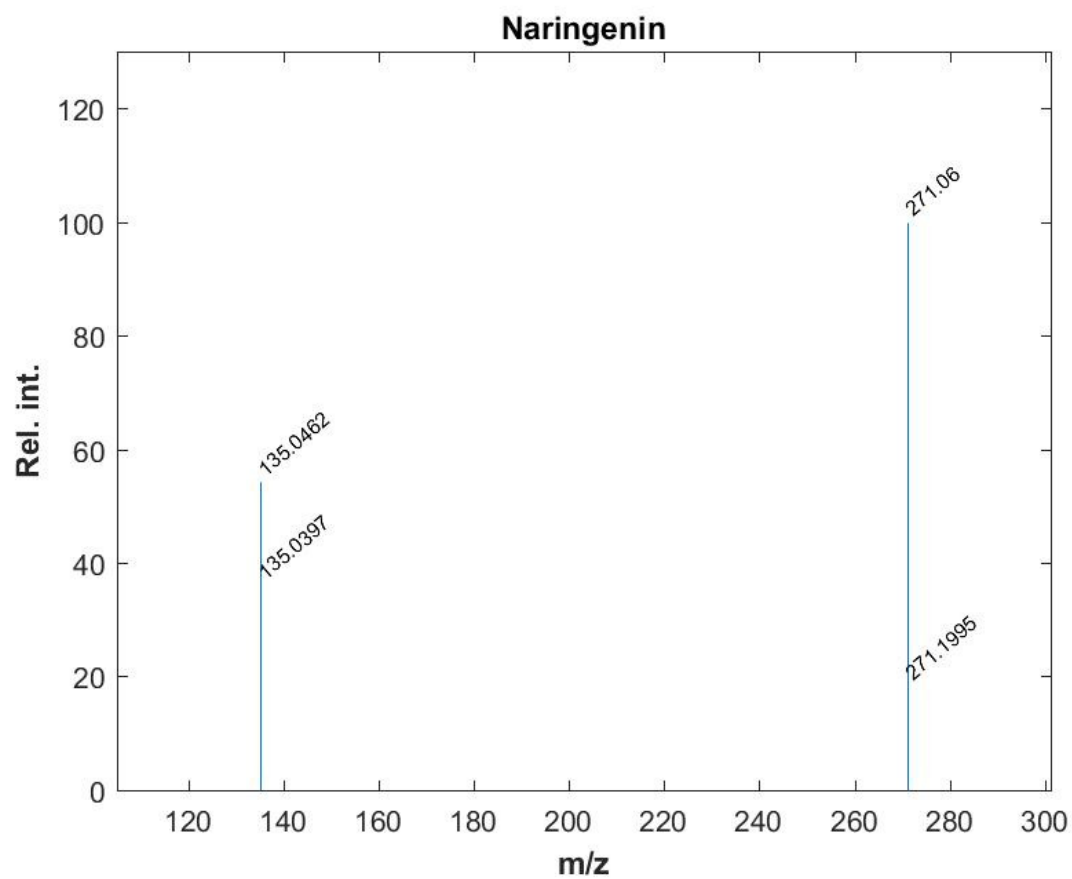

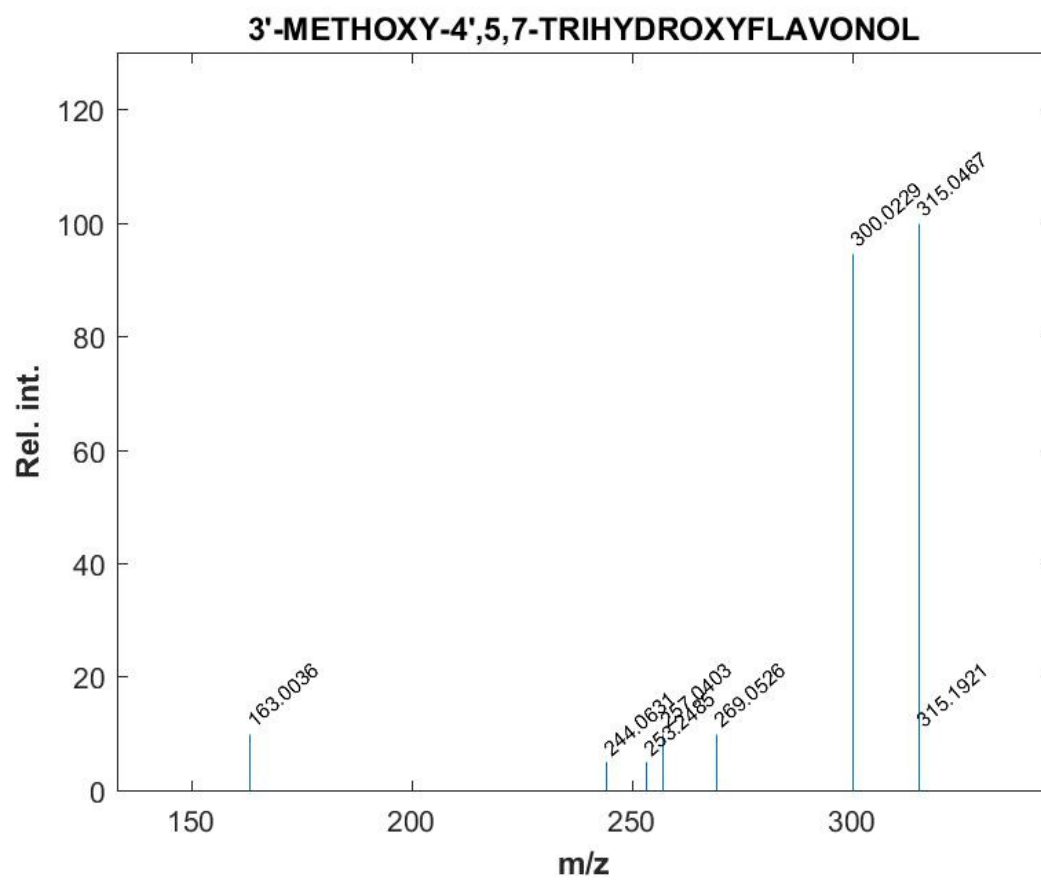

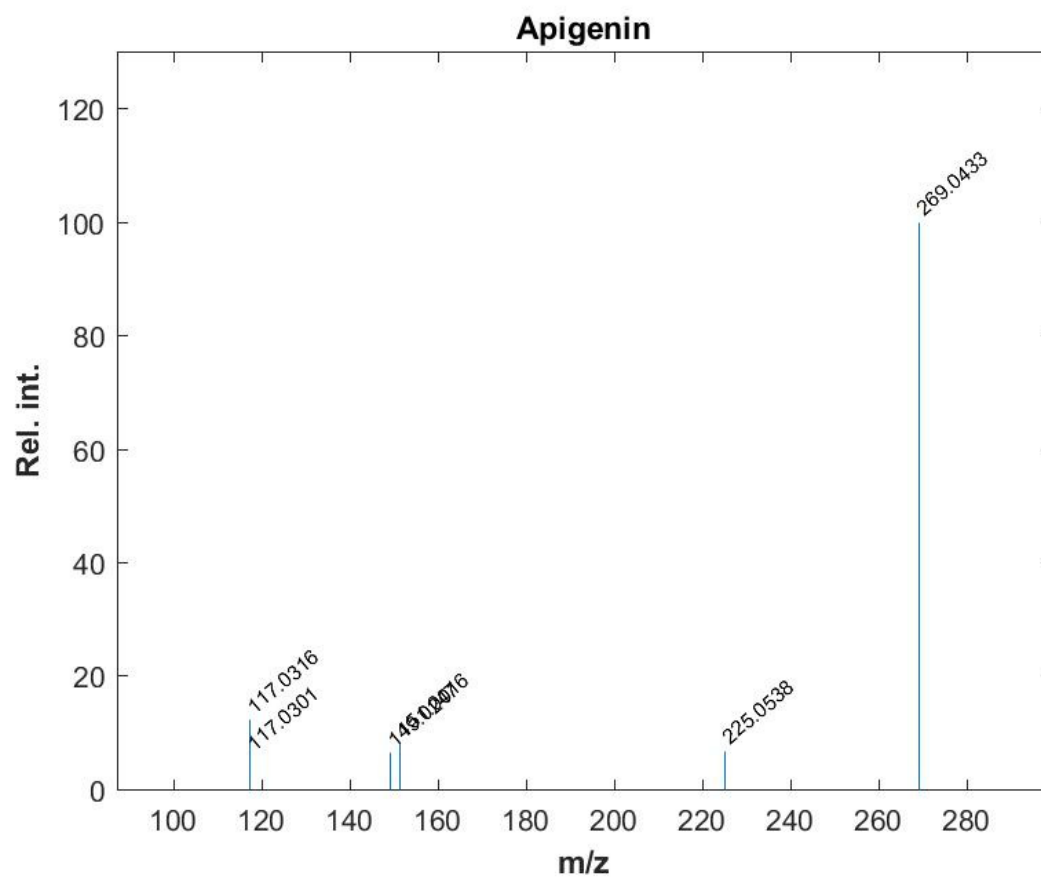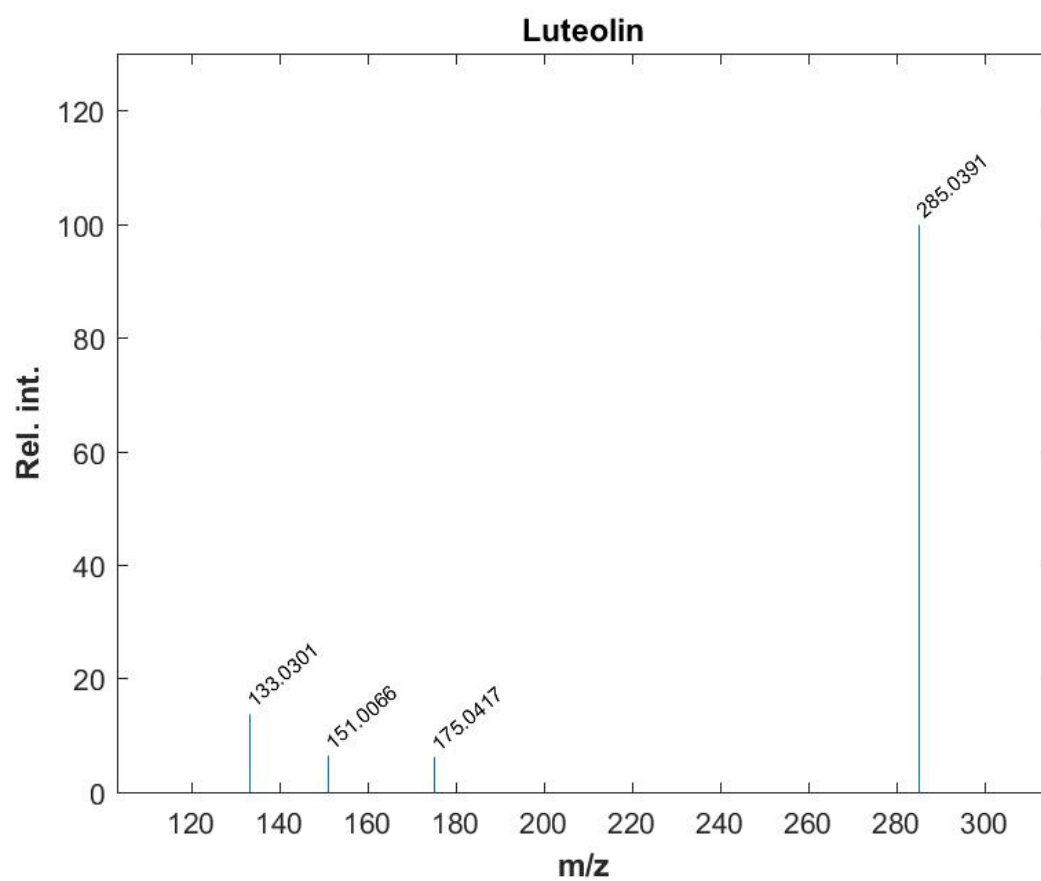

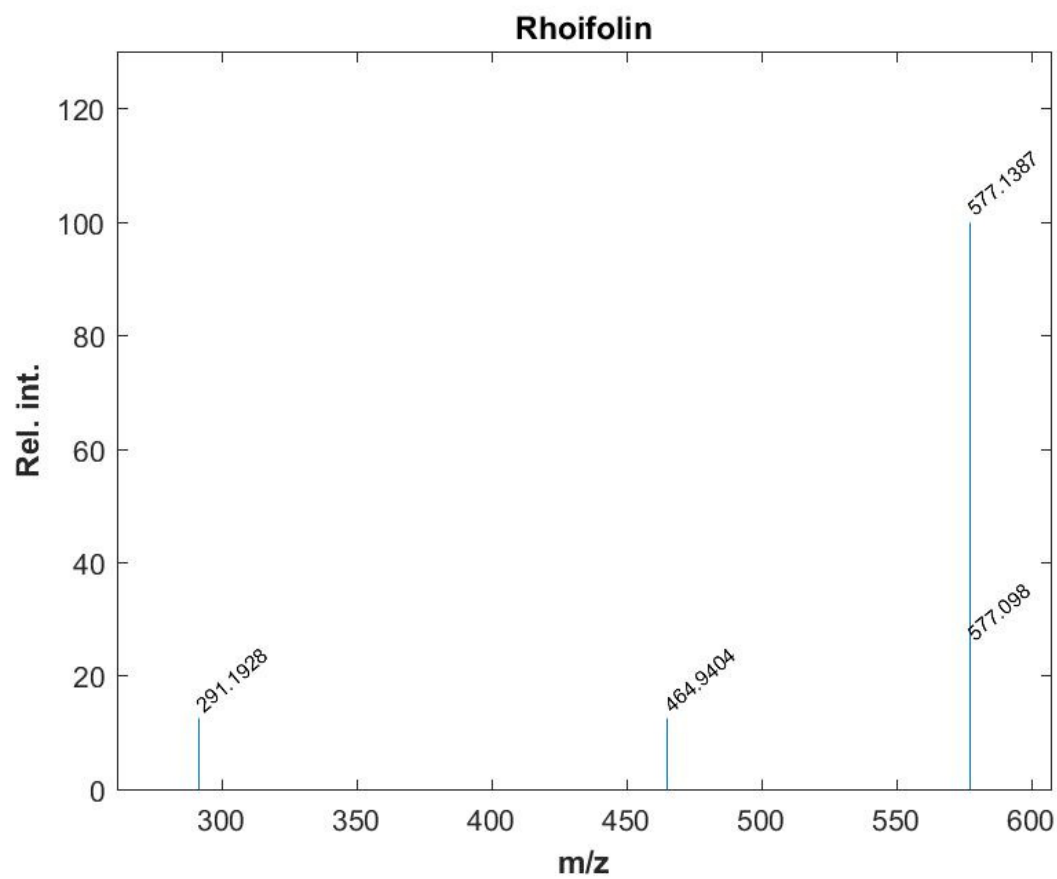

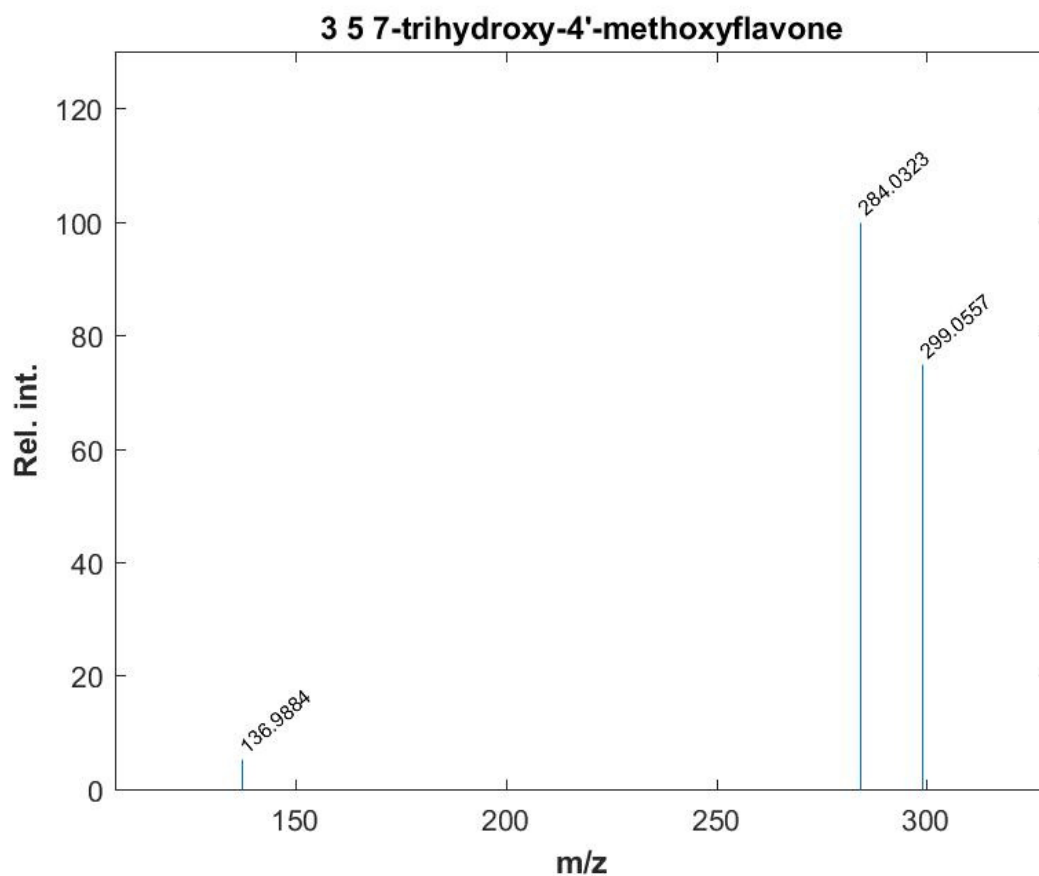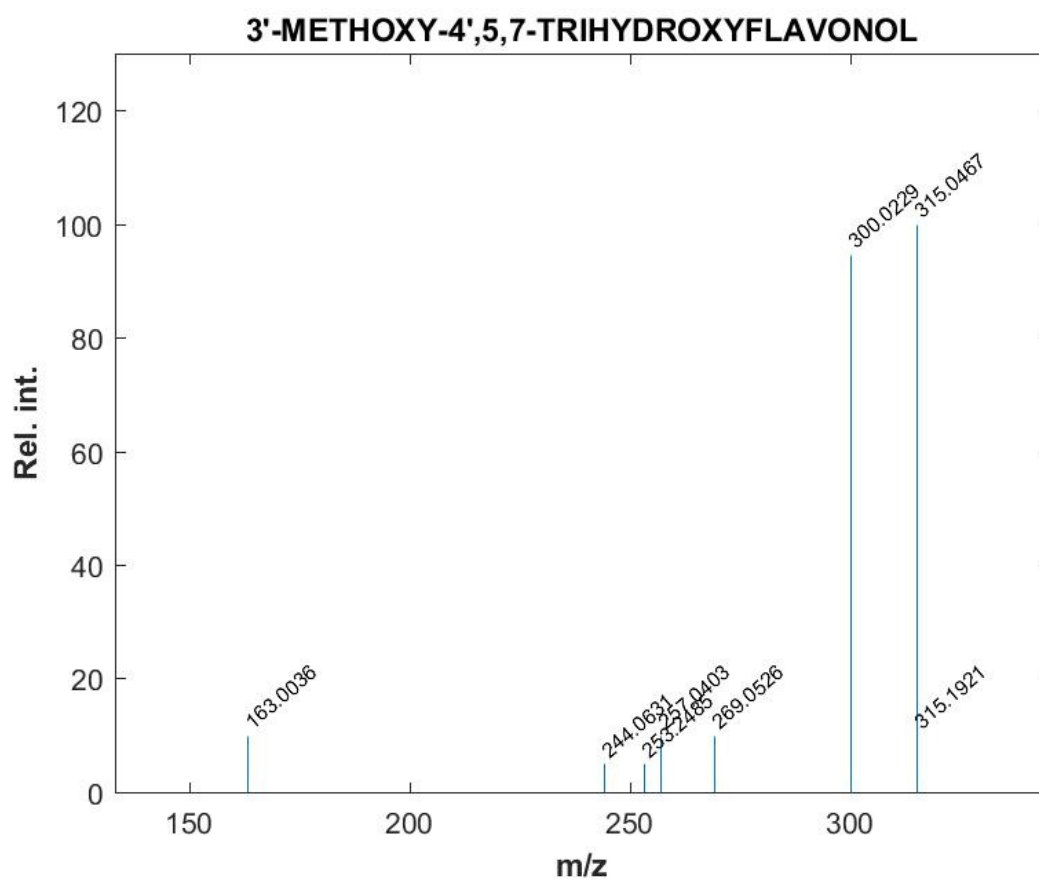

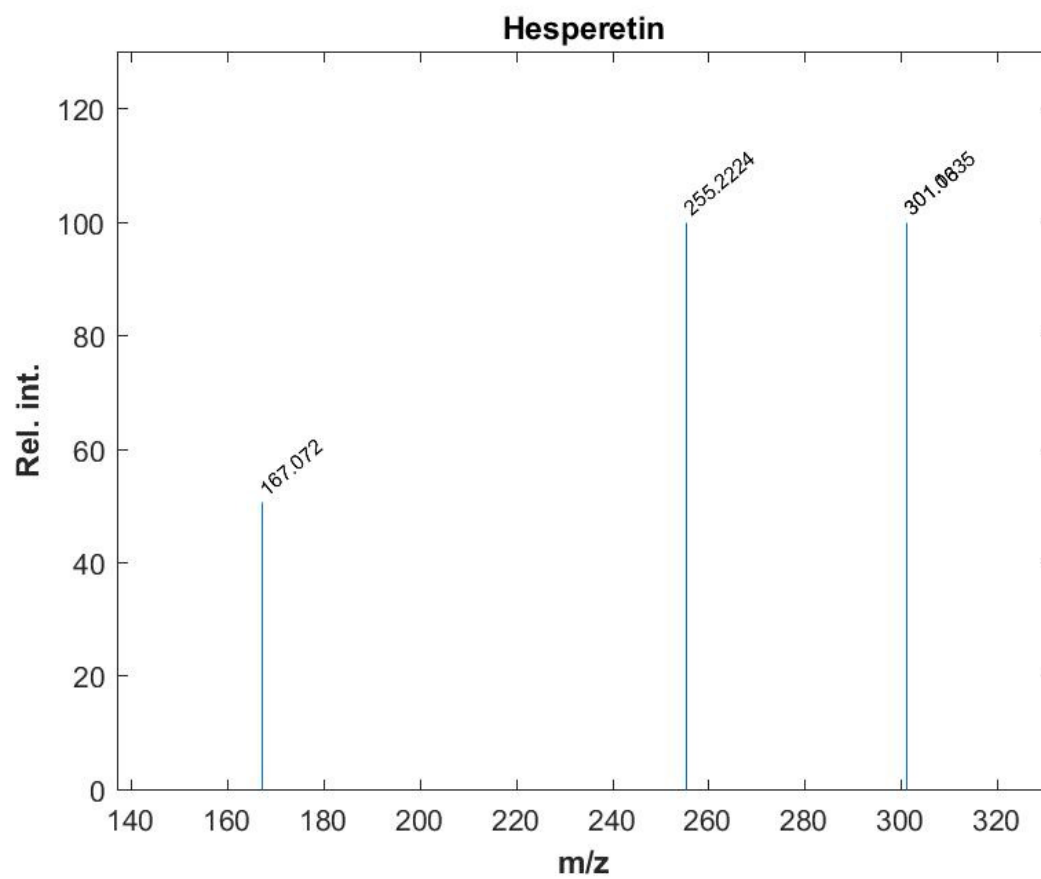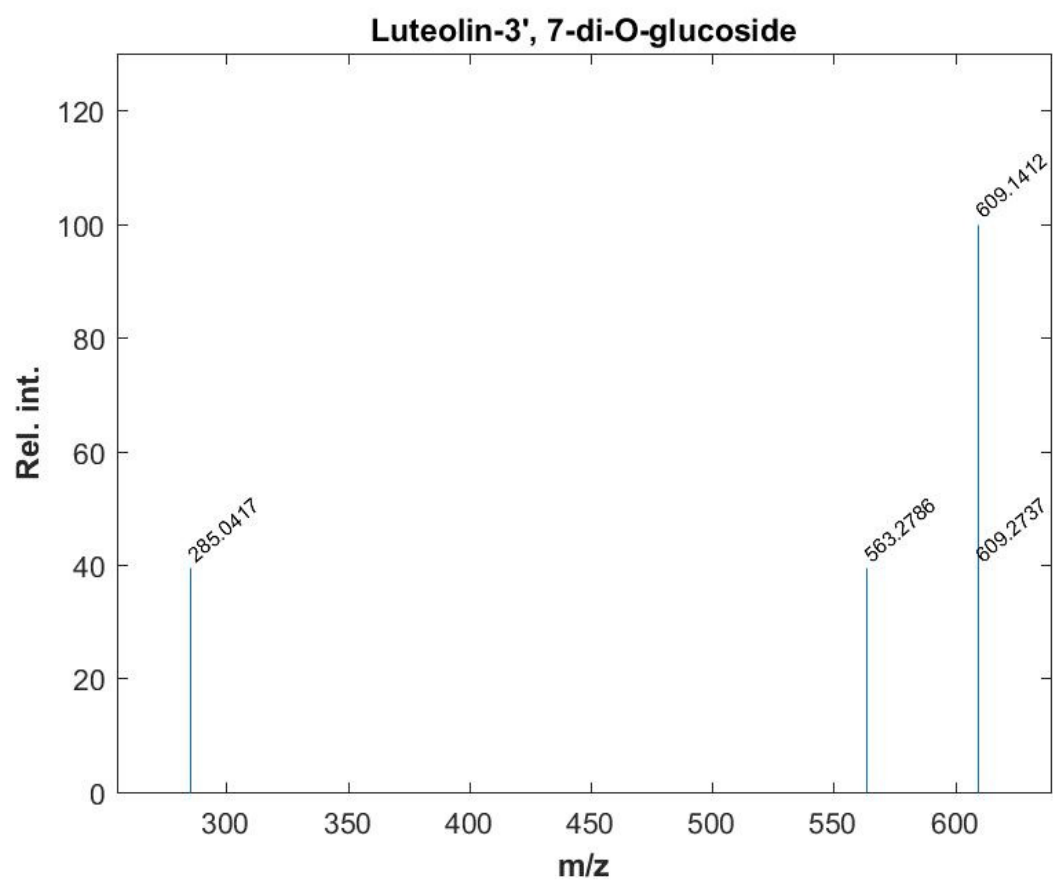



### 3-Hydroxy-3-Methylglutaric acid

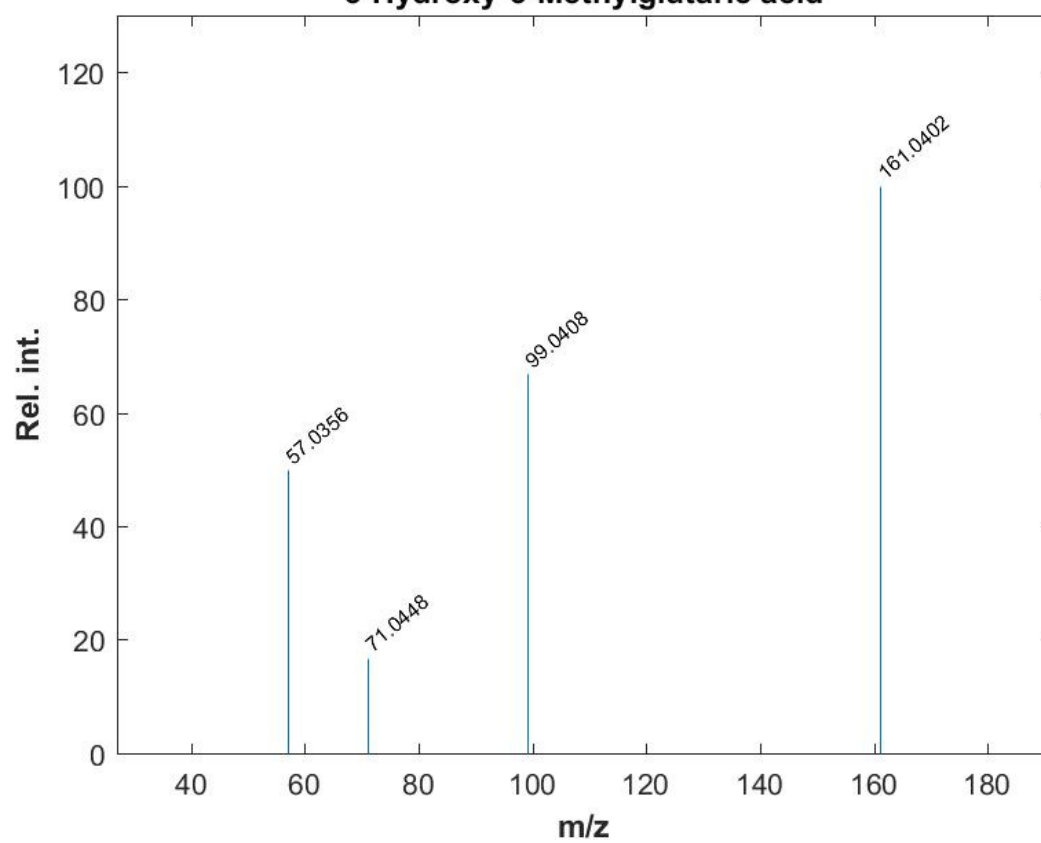

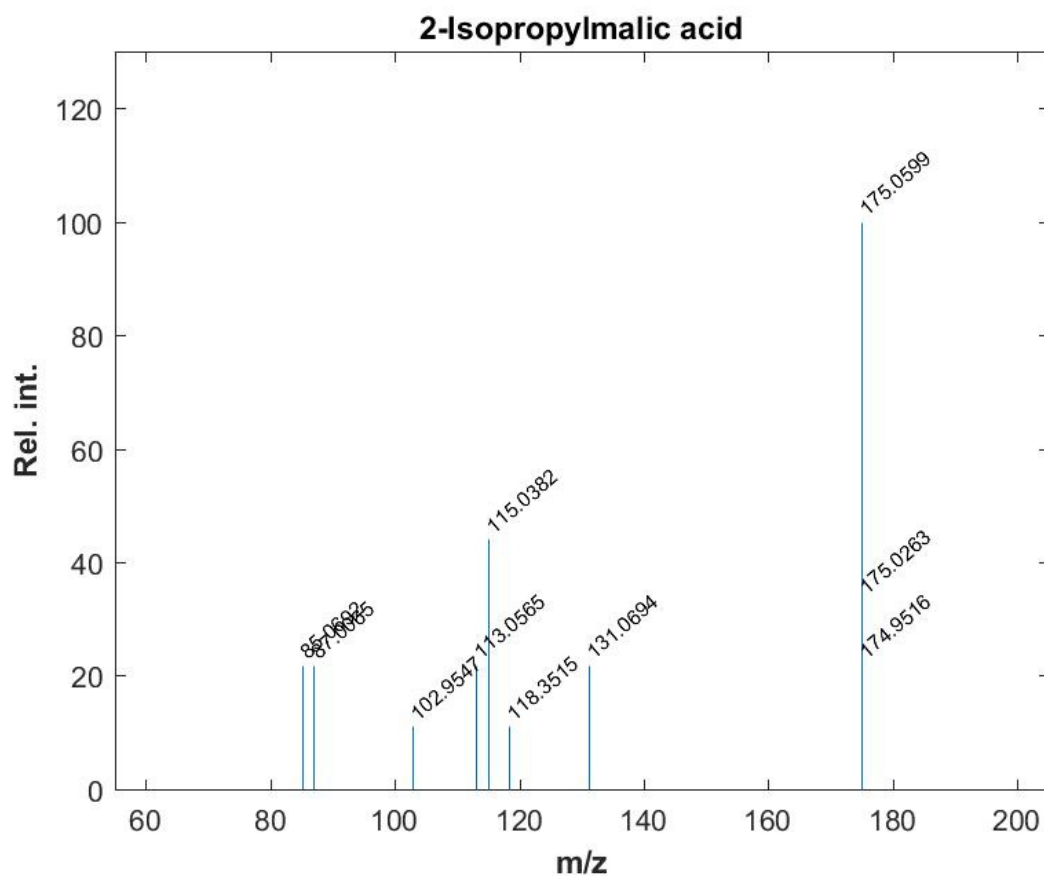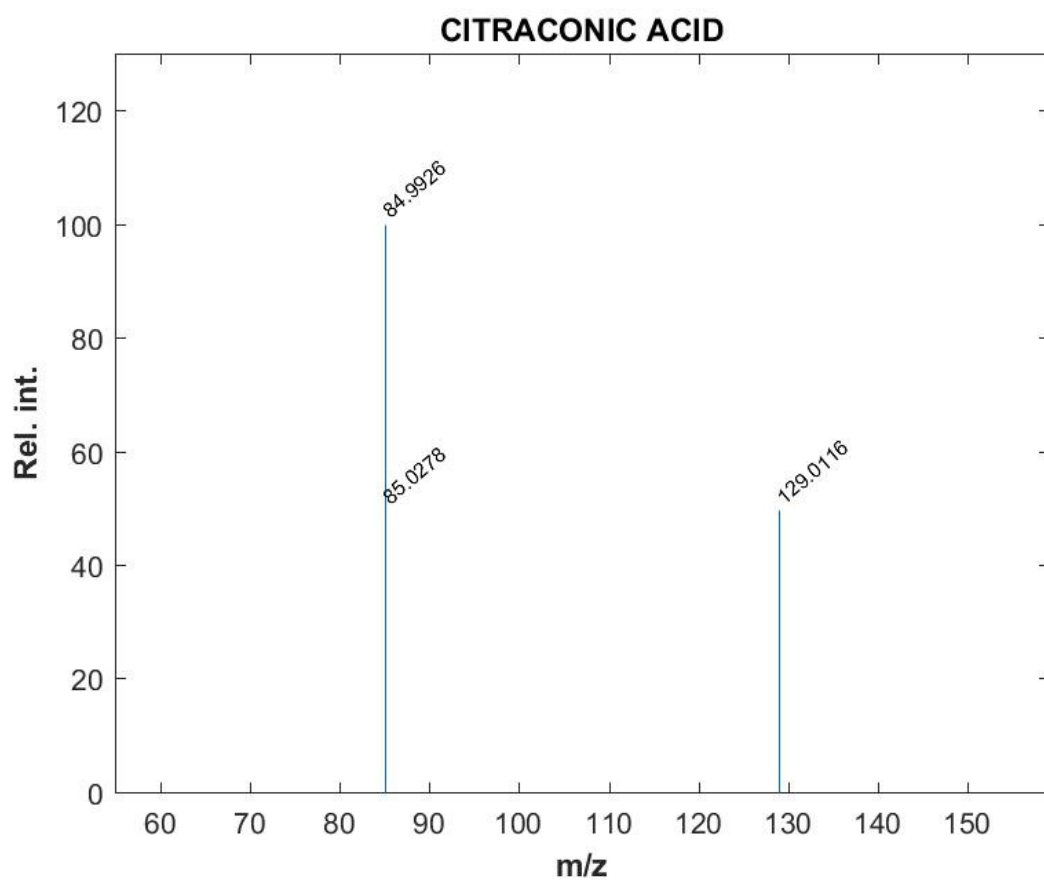

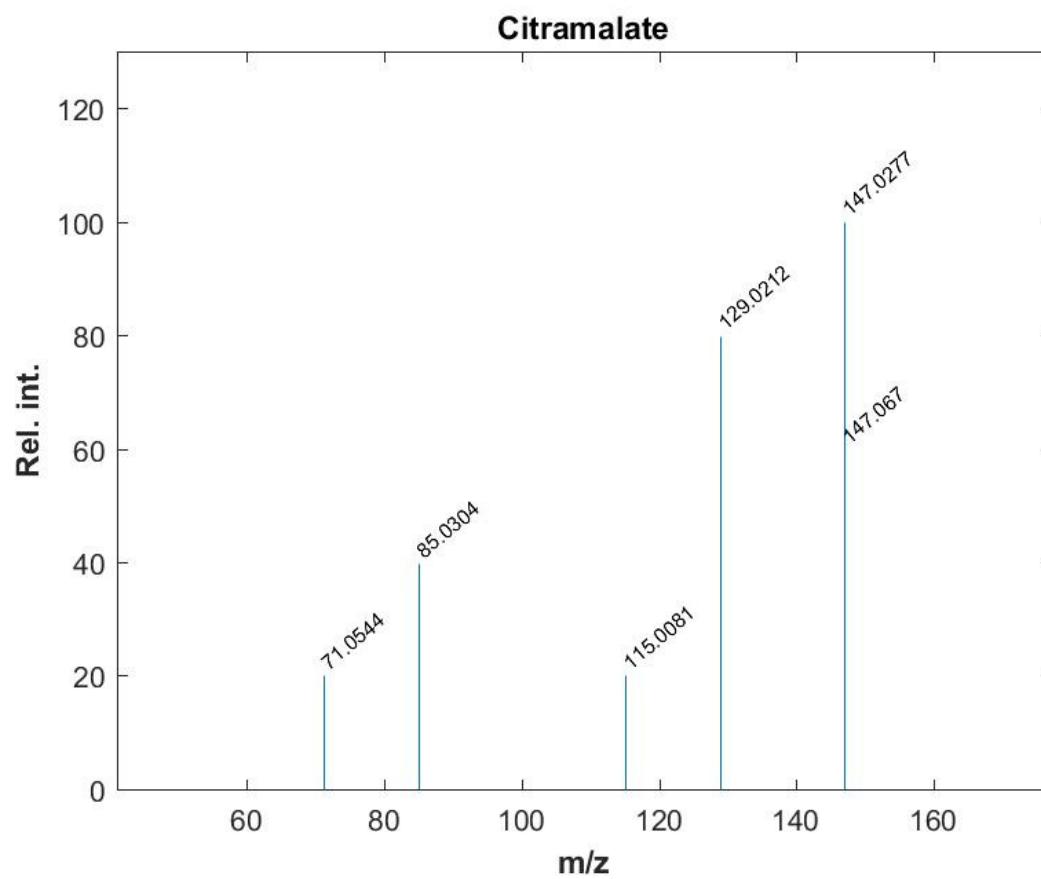

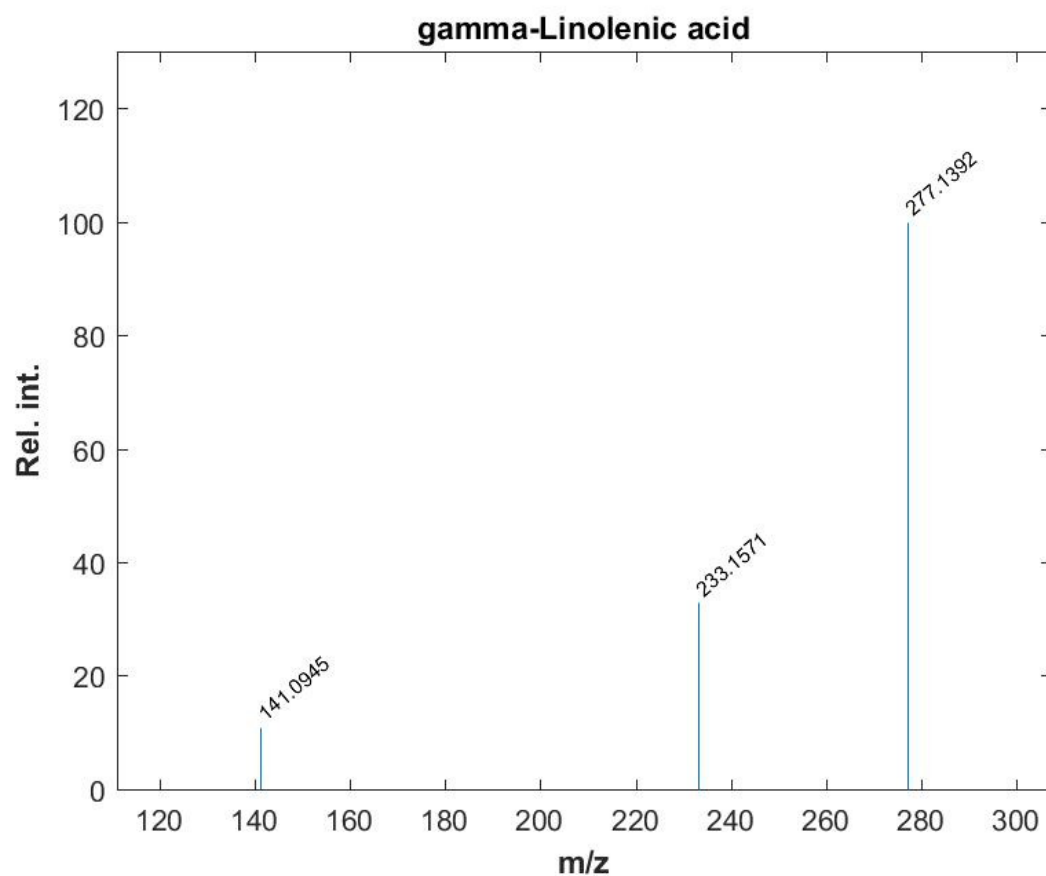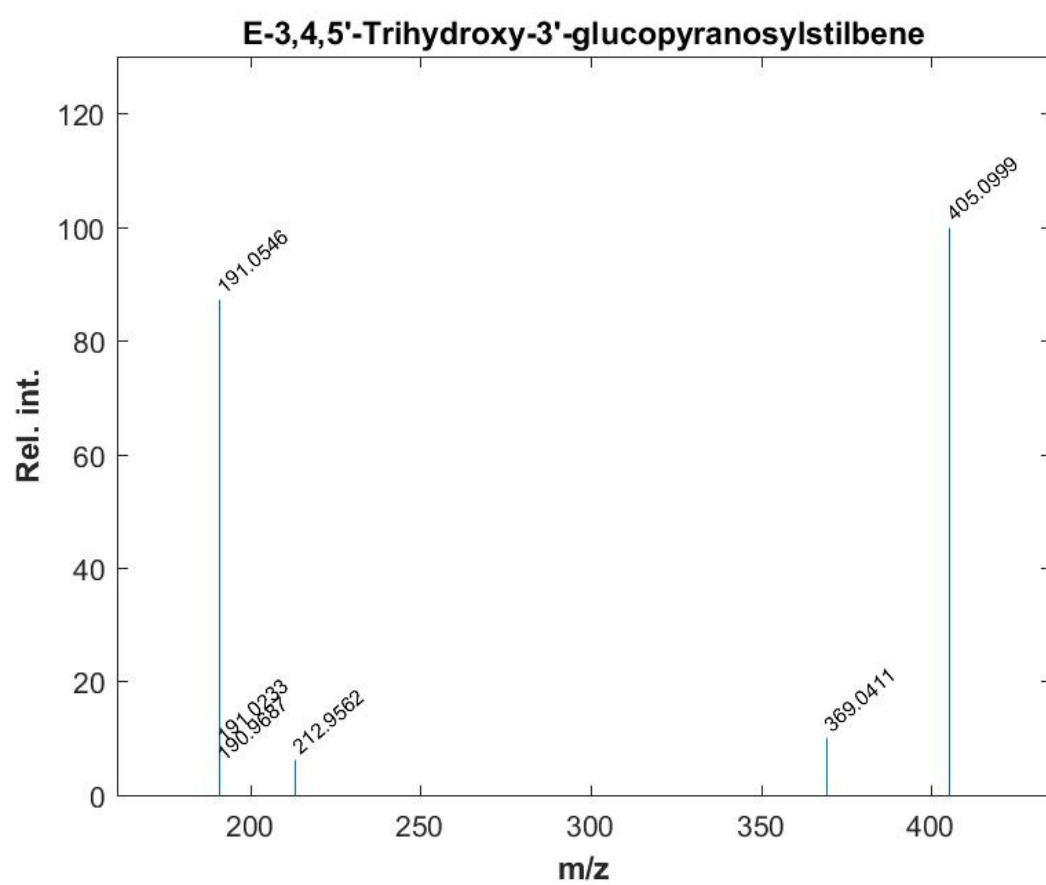

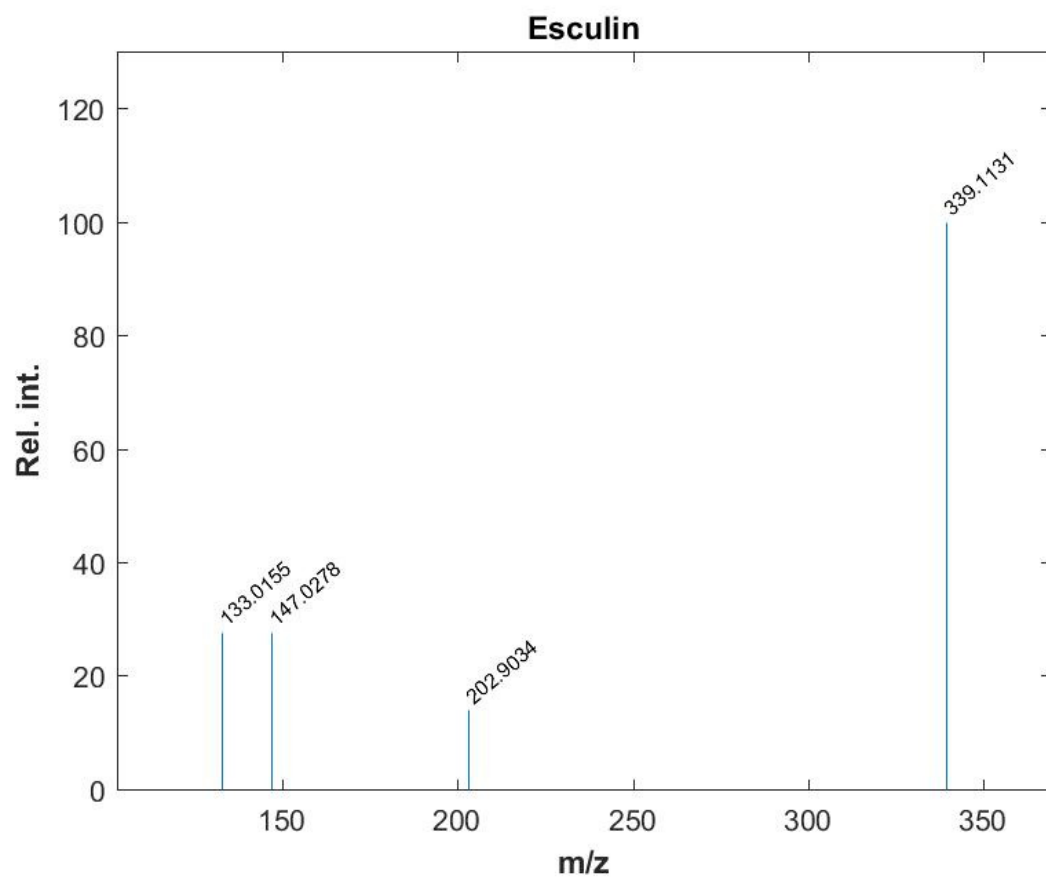

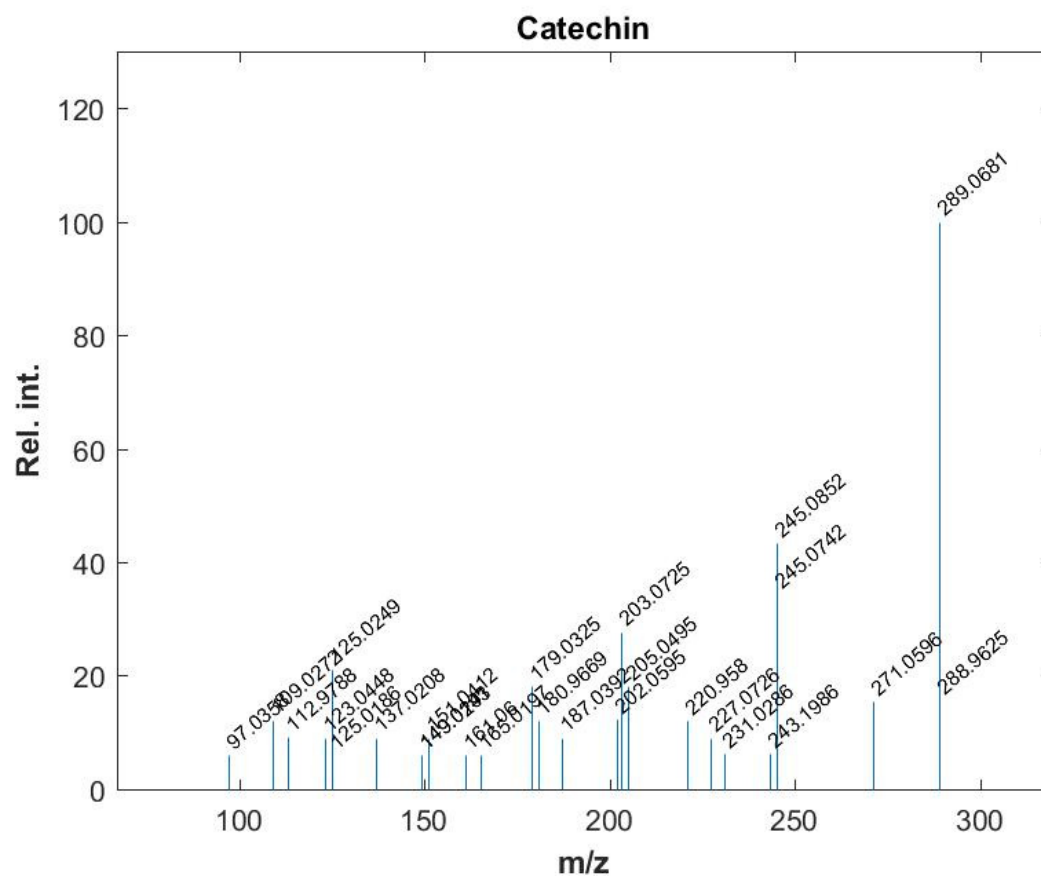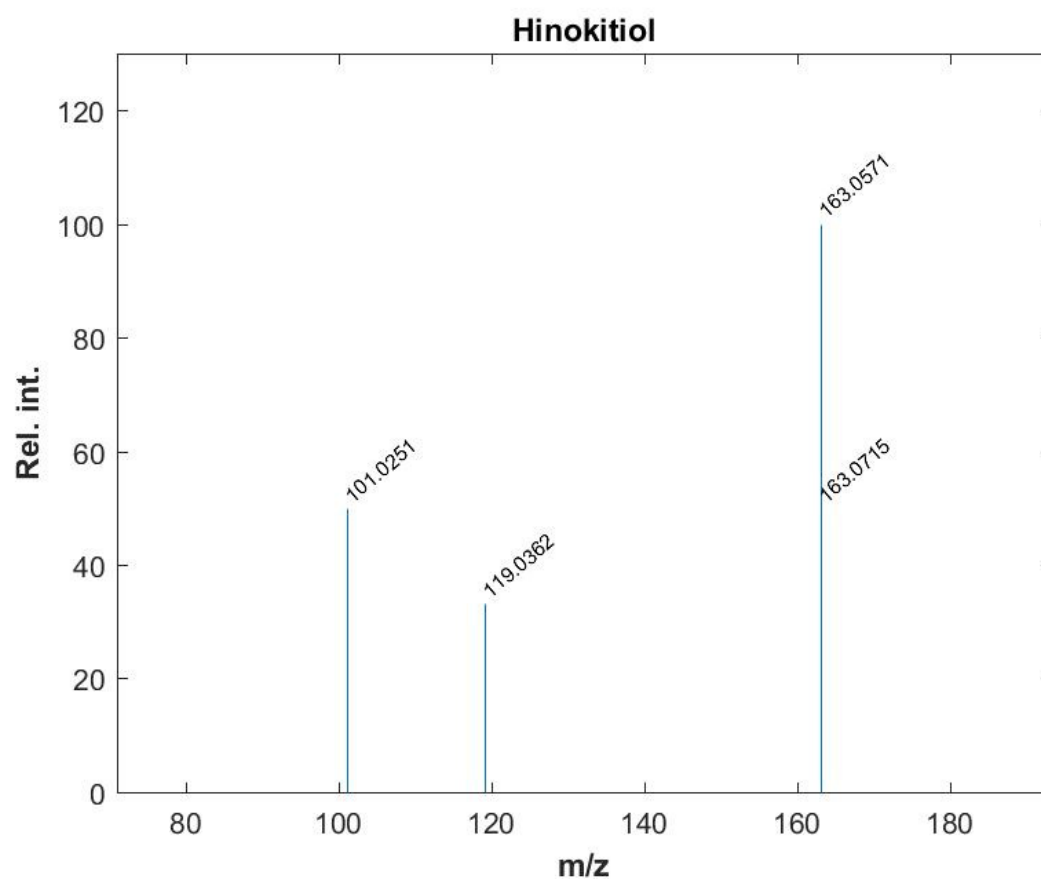

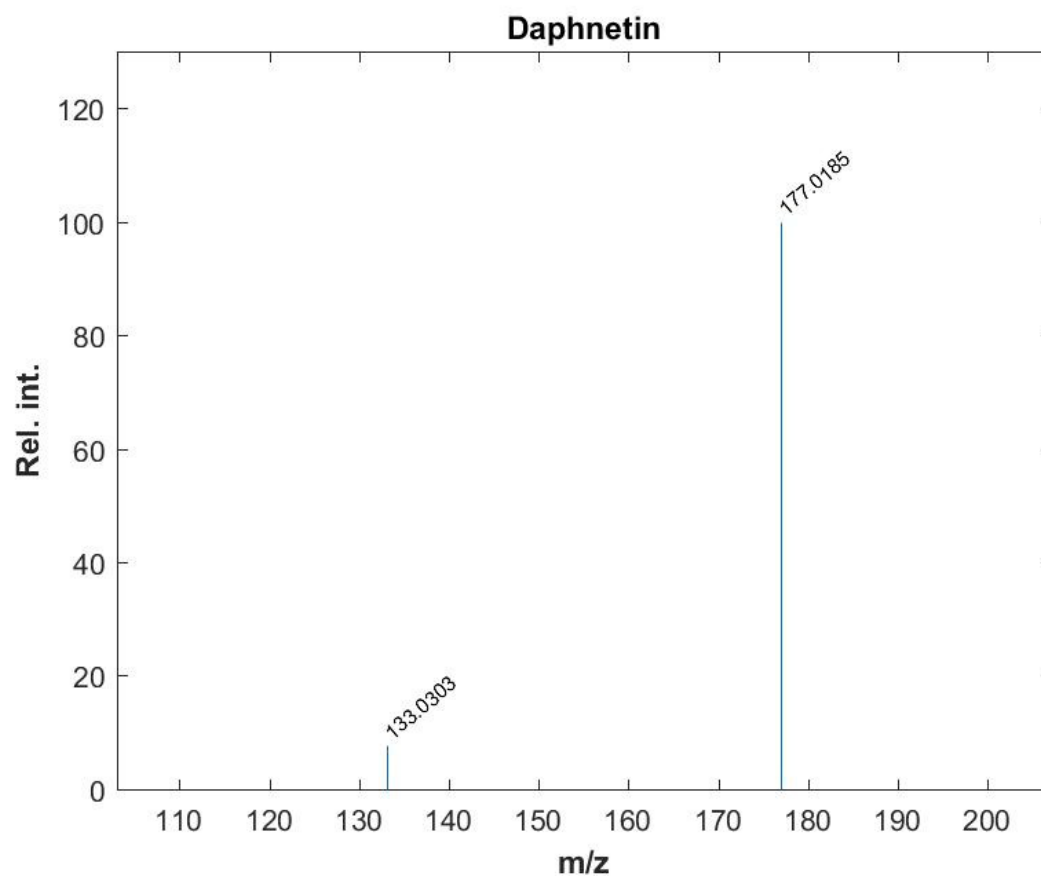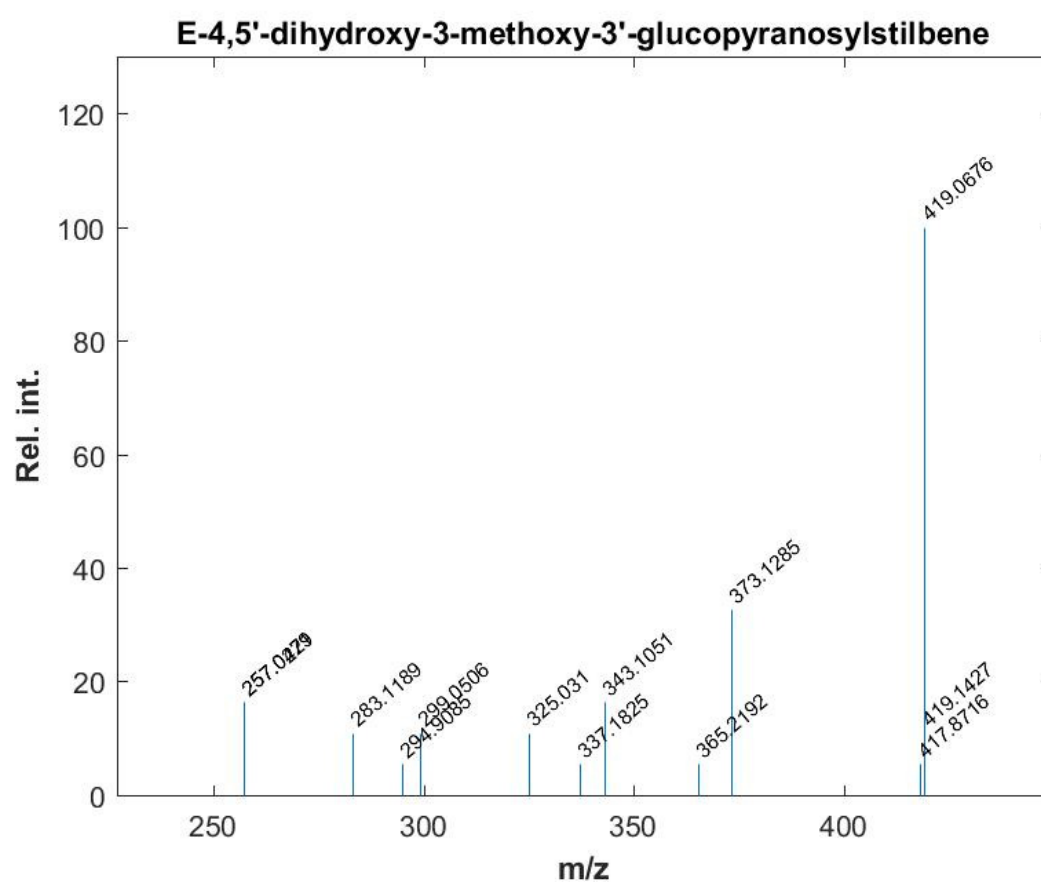

Supplement: s1 [file s1]
